# Supplementary material
Source: PubMed Central journal article supplement (PMC4009705)
Supplement: NIHMS532011-supplement-1.pdf [file NIHMS532011-supplement-1.pdf]

**Neuron Volume 80**

**Supplemental Information**

**Scaling Brain Size, Keeping Timing:**

**Evolutionary Preservation of Brain Rhythms**

**György Buzsáki, Nikos Logothetis, and Wolf Singer**

**Supplementary Note 1.** Table 1 was compiled based on the published works of Haug (1987) and Roth and Dicke (2005). Other important papers on brain volume, weight, neuronal density, neuronal number and body weight include Elias and Schwartz (1969) and (Roth and Dicke, 2005) and (Schüz and Sultan 2009). Further useful sources for brain weights:

<http://faculty.washington.edu/chudler/facts.html>

and

<http://mste.illinois.edu/malcz/DATA/BIOLOGY/Animals.html>.

In addition to brain volume and weight, Columns 3 and 6 (Mx/Mn) show the growth of each species-brain in units of the “minimum” brain; e.g., the human brain has a volume of ca. 5400 greater than that of the mouse and is about 4800 heavier than the mouse brain.

| Common Name           | Vol (cm <sup>3</sup> ) | Mx/Mn | Common Name          | Weight (g) | Mx/Mn |
|-----------------------|------------------------|-------|----------------------|------------|-------|
| Elephant              | 4,148                  | 17283 | African elephant     | 4200.0     | 14000 |
| False killer whale    | 3,650                  | 15208 | False killer whale   | 3650.0     | 12167 |
| Pilot whale, mean     | 2,720                  | 11333 | Man                  | 1450.0     | 4833  |
| Bottle nosed dolphin  | 1,345                  | 5604  | Bottlenose dolphin   | 1350.0     | 4500  |
| Human, mean           | 1,300                  | 5417  | Walrus               | 1130.0     | 3767  |
| Common dolphin, mean  | 715                    | 2979  | Camel                | 762.0      | 2540  |
| Horse                 | 510                    | 2125  | Gorilla              | 570.0      | 1900  |
| Common porpoise       | 483                    | 2013  | Horse                | 510.0      | 1700  |
| Chimpanzee            | 433                    | 1804  | Ox                   | 490.0      | 1633  |
| Gorilla               | 429                    | 1788  | Chimpanzee           | 430.0      | 1433  |
| Lion, mean            | 259                    | 1079  | Lion                 | 260.0      | 867   |
| Baboon                | 184                    | 767   | Sheep                | 140.0      | 467   |
| Sheep                 | 140                    | 583   | Old world monkeys    | 100.0      | 333   |
| Spider monkey         | 106                    | 442   | Rhesus monkey        | 88.0       | 293   |
| Woolly monkey         | 101                    | 421   | Gibbon               | 80.0       | 267   |
| Rhesus monkey, mean   | 88                     | 367   | Capuchin monkeys     | 70.0       | 233   |
| Coyote                | 85                     | 354   | Dog                  | 64.0       | 213   |
| Velvet monkey         | 64                     | 267   | White-front capuchin | 57.0       | 190   |
| Dog                   | 63.7                   | 265   | Fox                  | 53.0       | 177   |
| Capuchin monkey       | 57                     | 238   | Cat                  | 25.0       | 83    |
| Fox                   | 45                     | 188   | Squirrel monkey      | 23.0       | 77    |
| Raccoon               | 43                     | 179   | Rabbit               | 11.0       | 37    |
| Kangaroo, mean        | 42.5                   | 177   | Opossum              | 7.6        | 25    |
| Talapoin, mean        | 36                     | 150   | Marmoset             | 7.0        | 23    |
| Cat                   | 28.7                   | 120   | Squirrel             | 7.0        | 23    |
| Lemur, mean           | 25.8                   | 108   | Hedgehog             | 3.3        | 11    |
| Squirrel monkey, mean | 22.4                   | 93    | Rat                  | 2.0        | 7     |
| Night monkey          | 18.9                   | 79    | Mouse                | 0.3        | 1     |
| Rabbit                | 11.2                   | 47    |                      |            |       |
| Echidna               | 11                     | 46    |                      |            |       |
| Marmoset, mean        | 9.4                    | 39    |                      |            |       |
| Opossum, mean         | 7.8                    | 33    |                      |            |       |
| Weasel lemur          | 7.4                    | 31    |                      |            |       |
| Guinea pig, mean      | 3.9                    | 16    |                      |            |       |
| Hedgehog, mean        | 3.7                    | 15    |                      |            |       |
| Tree shrew            | 3                      | 13    |                      |            |       |
| Mouse lemur           | 1.9                    | 8     |                      |            |       |
| Rat                   | 1.7                    | 7     |                      |            |       |
| Mole                  | 1.4                    | 6     |                      |            |       |
| Mouse Opossum         | 1.2                    | 5     |                      |            |       |
| Mouse                 | 0.3                    | 1     |                      |            |       |
| Shrew, mean           | 0.24                   | 1     |                      |            |       |

Elias H, Schwartz D (1969) Surface Areas of Cerebral Cortex of Mammals Determined by Stereological Methods. Science 166:111-112.

Haug H (1987) Brain sizes, surfaces, and neuronal sizes of the cortex cerebri: a stereological investigation of man and his variability and a comparison with some mammals (primates, whales, marsupials, insectivores, and one elephant). American Journal of Anatomy 180:126-142.

Schüz A and Sultan F (2009) Brain Connectivity and Brain Size. In: Squire LR (ed.) Encyclopedia of Neuroscience, Vol. 2. Academic Press, Oxford, pp. 317-326.

## Supplementary Note 2. Types of brain rhythms in mammals

Below, we overview some of the best-studied rhythms without the aim of being comprehensive.

*Slow oscillations* (slow 1 in Fig. 1; 0.7-2 Hz; Steriade et al., 1993a) are the most prominent patterns during sleep. The LFP slow waves reflect alternating phases of synchronous

depolarization and spiking ('up state') and hyperpolarization ("down state') of large groups of cortical neurons (Steriade et al., 1993a; Timofeev et al., 2000; Sanchez-Vives and McCormick, 2000). The down state of slow oscillations, also known as the '*delta wave*', is a time frame of cortical silence and a potential rebooting and recuperating mechanism for energy conservation (Borbely, 1982; Isomura et al., 2006; Vyazovskiy and Harris, 2013, Cossart et al., 2003). Slow oscillations typically involve most of the neocortex, although isolated up and down states can also occur even within a small volume of tissue (Nir et al., 2011; Sirota and Buzsáki, 2006).

The transition from down to up states is the most synchronous part of slow oscillations. The large sudden shift of membrane voltage in many cortical neurons is reflected extracellularly as a 50-100 msec K wave (Fig. 2a). The strong spiking synchrony of deep layer cortical neurons associated with the K wave can trigger a reverberating thalamocortical event in the form of a *sleep spindle* (12-18 Hz; cf., Steriade et al., 1993b). The K wave and the induced spindle constitute a *K complex* (Loomis et al., 1937). Despite the several orders of magnitude larger travel distances of action potentials in the thalamocortical and corticothalamic loops in larger brains, the frequency range of the sleep spindle remains the same (12-18 Hz) in all mammals investigated (Fig. 2a). In addition to the preservation of frequency, the spindle shape of the transient event and its duration (0.5-2 sec) also remain quite similar.

*Alpha oscillations* (Fig. 2a), another family of thalamocortical rhythms, occur in waking but relaxed brain states and involve primarily the first-order thalamic nuclei and sensory cortical areas. The best known alpha patterns (8-12 Hz) emerge after eye closure and cessation of eye movements in the occipital-posterior part of the neocortex in primates and carnivores with large cortical domains dedicated to vision (Berger, 1929; Lopes da Silva et al., 1973; 1980; Klimesch 1997; Bollimunta et al., 2008; Hughes et al., 2004). The second form of alpha oscillations, also known as the Rolandic  $\mu$  rhythm (8-20 Hz) occurs in the somatosensory system during immobility but disappears upon movement initiation and even movement imagination (Fig. 2a; Gastaut et al., 1954; Pfurtscheller et al., 1996; 2000; Bouyer et al., 1983). In rodents, where face-whisker representation is particularly large, the  $\mu$  rhythm occurs synchronously over the parietal-frontal areas during immobility and is the dominant form of alpha oscillations (Buzsáki et al., 1988; Wiest and Nicolelis, 2003). The third alpha pattern is the tau rhythm of the auditory system, prominent in the absence of acoustic inputs (Tiihonen et al., 1991).

Most authors agree that alpha oscillations reflect a ground state to which the respective cortical area relaxes when disengaged from its sensory input and the rhythm is replaced by 'desynchronized' (i.e., gamma dominant) patterns when the area is activated (Pfurtscheller et al., 1996; Haegens et al., 2011). However, there are also instances when alpha activity increases with task difficulty together with high frequency oscillations. Here source localization indicates that alpha activity serves to repress distracting signals, thereby enhancing performance (Roux et al., 2012). This slower form of alpha (with an overlap with the theta band) can be induced by cognitive tasks in the more frontal regions of the cortex (Klimesch 1997). It is possible that this 'attention type' of alpha may arise in the limbic part of the thalamus and associated cortical regions, similar to the 'sensory' alpha oscillations and is generated by different mechanisms.

*Beta rhythms* are oscillations in the 12-30 Hz range that are pronounced in motor cortex, basal ganglia, cerebellum, hippocampus and even in peripheral motor-units during steady muscle contractions, while a response is withheld and to a lesser extent during immobility. Their origin, mechanisms and relationship to oscillations in the same frequency band (e.g., sleep spindles and beta patterns in the olfactory areas) are not well understood. In general, voluntary movements appear to be associated with a drop in beta power, and the termination of movement is followed by a restoration of beta power (Salmelin and Hari, 1994). Beta oscillations decrease substantially also during imagination, preparation and execution of movements (Murthy and Fetz, 1996;

Salmelin and Hari, 1994). In other words, somewhat analogous to the sensory alpha oscillations, beta rhythms reflect *disengagement* of the motor system from action by stabilizing a ‘status quo’ in posture and preventing the initiation of a new movement (Brown, 2000; Engel and Fries, 2010). Support for the latter interpretation comes from recordings in patients affected with Parkinson’s disease and from animal models of this syndrome. The inability to initiate movements or to stop ongoing locomotion is attributed to the failure to block ongoing beta oscillations in striatal circuits and to replace them by high frequency oscillations in the gamma range (Kuhn et al., 2008).

Overall, beta oscillations appear to coordinate the timing of action potentials of neurons in widespread brain areas with large distances from each other and along with muscles. During isometric contractions, for instance, beta rhythms are coherent between motor cortex and the contralateral electromyogram and beta-band coherence can also be observed between agonist muscles, suggesting a shared cortical drive (cf. Brown, 2000). In the same vein, simple cognitive and executive functions involve cooperation of numerous cortical areas and the formation of such transient, task-dependent functional networks is usually associated with increased coherence in the beta frequency range (Roelfsema et al., 1997; Dehaene et al., 2006). Recently, it has been proposed that bottom-up processing is coordinated mainly in the gamma – and top-down control mainly in the beta band (Buffalo et al., 2011; Bosman et al., 2012).

*Theta oscillations* represent a consortium of mechanisms, supported by various intracellular and circuit properties of the septo-hippocampal-entorhinal system (Buzsáki, 2002). They are strongly involved in various cross-frequency interaction mechanisms, in both the hippocampus and cortex. Theta rhythms, for instance, modulate the firing rate and spike timing of single hippocampal or cortical neurons (Bragin et al., 1995, Buzsaki et al., 2003, Lee et al., 2005; Liebe et al., 2012), and the gamma power of the LFP (Bragin et al., 1995; Chrobak and Buzsaki, 1998, Canolty et al., 2006). Importantly, theta-gamma cross-frequency coupling has been shown to correlate with navigation and memory performance in rats (Tort et al., 2009), as well as with memory in monkeys (Lee et al., 2005) and humans (Canolty et al., 2006, Axmacher et al., 2010, Griesmayr et al., 2010).

Rhythms in the theta frequency bands are also observed in various parts of the neocortex. In monkeys the cortical theta frequency is in the range of 3-9 Hz (Lee et al., 2005, Liebe et al., 2012), and in humans 4-12 Hz, e.g. (Raghavachari et al., 2006, Anderson et al., 2010). However, their origin and their relationship with hippocampal theta oscillations remain to be clarified. The prominent midline prefrontal ‘theta’ is often dominated by a lower frequency (4 Hz) peak, and this LFP pattern might represent a ventral tegmental area (VTA) - nucleus accumbens - prefrontal cortex “4 Hz” oscillation, independent but coupled with the hippocampal theta rhythm (Fujisawa et al., 2011; Siapas et al., 2005; Sigurdsson et al., 2010).

*Gamma oscillations* (30–90 Hz) are the most ubiquitous rhythm, present in all structures and brain states. The gamma generators have been studied in great detail both at the experimental and theoretical level (Jefferys et al., 1996; Kopell et al., 2000; Traub et al., 1996, 2001; Buzsáki and Wang, 2012; Buhl et al., 2003; Wang 2010). Gamma oscillations emerge from the network of reciprocally coupled pyramidal cells and parvalbumin containing inhibitory basket cells that inhibit pyramidal cells with a dense plexus of perisomatic synapses. This network of inhibitory neurons engages in synchronized gamma oscillations whenever sufficiently activated and then periodically modulates pyramidal cell excitability. The excitatory drive for the inhibitory interneurons is provided both by external input and recurrent collaterals from the pyramidal cells.

Recordings in patients with epicortical (ECoG) and depth electrodes revealed task dependent increases in the power of LFP activity in a frequency range above the classical gamma frequency

band (epsilon; >90 Hz) (Lachaux et al., 2000; Mukamel et al., 2005). This power increase is often broad-band and does not produce a distinct peak in the 1/f spectrogram. Although this broad-band activity is often labeled as ‘high gamma’ and discussed together with gamma oscillations, its oscillatory nature has yet to be demonstrated. It most likely reflects increased spiking and spike afterpotentials without an oscillatory component (Whittingstall and Logothetis, 2009; Belluscio et al., 2012; Ray and Maunsell, 2011).

*Ripples.* The most precisely synchronized cortical rhythm is the fast ‘*ripple*’ oscillation of the hippocampus (130-160 Hz: Buzsáki et al., 1992; O’Keefe and Nadel, 1978) and neocortex (300-500 Hz: Kandel and Buzsáki, 1997; Buzsáki and Lopes da Silva, 2012). The physiological importance of hippocampal ripples is that in the short time window of the ripple event (50-100 ms) spikes of neurons active in the preceding learning and exploration experience are replayed in a compressed manner (Wilson and McNaughton, 1994; Carr et al., 2011). Selective abolishment of ripples prevents consolidation of previously learned information (Girardeau et al., 2007). Given its local generation, it is perhaps not surprising that the frequency of these fast rhythms remains constant over the course of mammalian evolution (Fig. 2a). On the other hand, the synchronous hippocampal output can exert a powerful influence on both widespread cortical and subcortical structures in both rats and monkeys (Siapas et al., 2005; Logothetis et al., 2013) and appropriate timing of these widespread regions demand structural support.

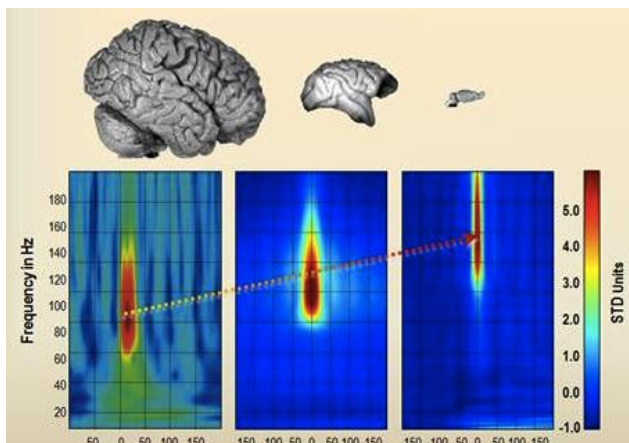

Wavelet illustration of dominant spectral power of hippocampal ripples in the human (100 Hz), monkey (120 Hz) and rat (140 Hz) brains. Data from the human brain is after Axmacher et al. (2008); monkey ripple from Logothetis et al. (2012).

*Ultraslow rhythms* (<0.1 Hz; slow 2-4 in Fig. 1B) involve coherent fluctuations of resting state activity across large areas of the neocortex and subcortical sites that can even be detected in the slow fMRI signals. Such slow and coordinated oscillations (0.1-0.02 Hz) of cortical network excitability have been discovered in humans (revealing the so called “default network”, (Raichle et al., 2001), confirmed in a variety of species, (monkeys: Leopold et al., 2003, cats: Popa et al., 2009; rats: Sirota et al., 2003) and now routinely used to identify functional networks.

## References:

- Anderson, K.L., and Ding, M. (2011). Attentional modulation of the somatosensory mu rhythm. *Neuroscience* 180, 165-180.
- Axmacher, N., Elger, C. E., & Fell, J. (2008). Ripples in the medial temporal lobe are relevant for human memory consolidation. *Brain*, 131, 1806-1817.
- Axmacher, N., Henseler, M.M., Jensen, O., Weinreich, I., Elger, C.E., and Fell, J. (2010). Cross-frequency coupling supports multi-item working memory in the human hippocampus. *Proc. Natl. Acad. Sci. USA* 107, 3228-3233.
- Belluscio, M.A., Mizuseki, K., Schmidt, R., Kempter, R., and Buzsáki, G. (2012). Cross-frequency phase-phase coupling between  $\theta$  and  $\gamma$  oscillations in the hippocampus. *J. Neurosci.* 32, 423-435.
- Berger, H. (1929). Über das Elektroencephalogramm des Menschen. *Arch. Psychiat. Nervenkr.* 87, 527-570.
- Bollimunta, A., Chen, Y., Schroeder, C.E., and Ding, M. (2008). Neuronal mechanisms of cortical alpha oscillations in awake- behaving macaques. *J. Neurosci.* 28, 9976–9988.

- Bosman, C., Schoeffelen, J.-M., Brunet, N., Oostenveld, R., Bastos, A.M., Womelsdorf, T., Rubehn, B., Stieglitz, T., De Weerd, P., and Fries, P. (2012). Attentional stimulus selection through selective synchronization between monkey visual areas. *Neuron* 75, 875-888.
- Bouyer, J.J., Rougeul, A., and Buser, P. (1982). Somatosensory rhythms in the awake cat: a single unit exploration of their thalamic concomitant in nucleus ventralis posterior and vicinity. *Arch. Ital. Biol.* 120, 95-110.
- Borbely, A.A. (1982). A two process model of sleep regulation. *Hum. Neurobiol.* 1, 195-204.
- Bragin, A., Jandó, G., Nádasdy, Z., Hetke, J., Wise, K., and Buzsáki, G. (1995). Gamma (40-100 Hz) oscillation in the hippocampus of the behaving rat. *J. Neurosci.* 15, 47-60.
- Brown, P. (2006). Bad oscillations in Parkinson's disease. *J. Neural. Transm. Suppl.* 70, 27-30.
- Buhl, D.L., Harris, K.D., Hormuzdi, S.G., Monyer, H., and Buzsáki, G. (2003). Selective impairment of hippocampal gamma oscillations in connexin-36 knock-out mouse *in vivo*. *J. Neurosci.* 23, 1013-1018.
- Buffalo, E.A., Fries, P., Landman, R., Buschman, T.J., and Desimone, R. (2011). Laminar differences in gamma and alpha coherence in the ventral system. *Proc. Natl. Acad. Sci. USA* 108, 11262-11267.
- Buzsáki, G. (2002). Theta oscillations in the hippocampus. *Neuron* 33, 325-340.
- Buzsáki, G., and Silva, F.L. (2012). High frequency oscillations in the intact brain. *Prog. Neurobiol.* 98, 241-249.
- Buzsáki, G., and Wang, X.J. (2012). Mechanisms of gamma oscillations. *Annu. Rev. Neurosci.* 35, 203-225.
- Buzsáki, G., Buhl, D.L., Harris, K.D., Csicsvari, J., Czéh, B., Morozov, A. (2003). Hippocampal network patterns of activity in the mouse. *Neuroscience* 116, 201-211.
- Buzsáki, G., Bickford, R.G., Ponomareff, G., Thal, L.J., Mandel, R., and Gage, F.H. (1988). Nucleus basalis and thalamic control of neocortical activity in the freely moving rat. *J. Neurosci.* 8, 4007-4026.
- Canolty, R.T., Edwards, E., Dalal, S.S., Soltani, M., Nagarajan, S.S., Kirsch, H.E., Berger, M.S., Barbaro, N.M., and Knight, R.T. (2006). High gamma power is phase-locked to theta oscillations in human neocortex. *Science* 313, 1626-1628.
- Carr, M.F., Jadhav, S.P., and Frank, L.M. (2011). Hippocampal replay in the awake state: a potential substrate for memory consolidation and retrieval. *Nat. Neurosci.* 14, 147-153.
- Cossart, R., Aronov, D., and Yuste, R. (2003). Attractor dynamics of network UP states in the neocortex. *Nature* 423, 283-288.
- Chrobak, J.J., and Buzsáki, G. (1998). Gamma oscillations in the entorhinal cortex of the freely behaving rat. *J. Neurosci.* 18, 388-398.
- Dehaene, S., Changeux, J.-P., Naccache, L., Sackur, J., and Sergent, C. (2006). Conscious, preconscious, and subliminal processing: a testable taxonomy. *Trends Cogn. Sci.* 10, 204-211.
- Engel, A.K., and Fries, P. (2010). Beta-band oscillations--signalling the status quo? *Curr. Opin. Neurobiol.* 20, 156-165.
- Fujisawa, S., and Buzsáki, G. (2011). A 4 Hz oscillation adaptively synchronizes prefrontal, VTA, and hippocampal activities. *Neuron* 72, 153-165.
- Gastaut, H., and Bert, J. (1954). EEG changes during cinematographic presentation. *Electroenceph. Clin. Neurophysiol.* 6, 433-444.
- Girardeau, G., Benchenane, K., Wiener, S.I., Buzsáki, G., and Zugaro, M.B. (2009). Selective suppression of hippocampal ripples impairs spatial memory. *Nat. Neurosci.* 12, 1222-1223.
- Griesmayr, B., Gruber, W.R., Klimesch, W., and Sauseng, P. (2010). Human frontal midline theta and its synchronization to gamma during a verbal delayed match to sample task. *Neurobiology of learning and memory* 93, 208-215.
- Haegens, S., Händel, B.F., and Jensen, O. (2011). Top-down controlled alpha band activity in somatosensory areas determines behavioral performance in a discrimination task. *J. Neurosci.* 31, 5197-5204.
- Hughes, S.W., Lörincz, M., Cope, D.W., Blethyn, K.L., Kékesi, K.A., Parri, H.R., Juhász, G., and Crunelli, V. (2004). Synchronized oscillations at alpha and theta frequencies in the lateral geniculate nucleus. *Neuron* 42, 253-68.
- Isomura, Y., Sirota, A., Ozen, S., Montgomery, S., Mizuseki, K., Henze, D.A., and Buzsáki, G. (2006). Integration and segregation of activity in entorhinalhippocampal subregions by neocortical slow oscillations. *Neuron* 52, 871-882.
- Jefferys, J.G.R., Traub, R.D., and Whittington, M.A. (1996). Neuronal networks for induced '40Hz' rhythms. *Trends Neurosci.* 19, 202-208.
- Kopell, N., Ermentrout, G.B., Whittington, M.A., and Traub, R.D. (2000). Gamma rhythms and beta rhythms have different synchronization properties. *Proc. Natl. Acad. Sci. USA* 97, 1867-1872.
- Kuhn, A.A., Kempf, F., Brucke, C., Gaynor Doyle, L., Martinez-Torres, I., Pogosyan, A., Trottenberg, T., Kupsch, A., Schneider, G.-H., Hariz, M.I., Vandenberghe, W., Nuttin, B., and Brown, P. (2008). High-frequency stimulation of the subthalamic nucleus suppresses oscillatory beta-activity in patients with Parkinson's disease in parallel with improvement in motor performance. *J. Neurosci.* 28, 6165-6173.
- Lachaux, J.-P., Rodriguez, E., Martinerie, J., Adam, C., Hasboun, D., and Varela, F.J. (2000). A quantitative study of gamma-band activity in human intracranial recordings triggered by visual stimuli. *Europ. J. Neurosci.* 12, 2608-2622.

- Lee H, Simpson GV, Logothetis NK, Rainer G. (2005). Phase locking of single neuron activity to theta oscillations during working memory in monkey extrastriate visual cortex. *Neuron*. 45, 147-156.
- Liebe S, Hoerzer GM, Logothetis NK, Rainer G. (2012) Theta coupling between V4 and prefrontal cortex predicts visual short-term memory performance. *Nat Neurosci*. 15, 456-462.
- Loomis, A.L., Harvey, E.N., and Hobart, G.A. (1937). Cerebral states during sleep as studied by human brain potentials. *J. Exp. Psychol*. 21, 127-144.
- Kandel, A., and Buzsáki, G., (1997). Cellular-synaptic generation of sleep spindles, spike-and-wave discharges, and evoked thalamocortical responses in the neocortex of the rat. *J. Neurosci*. 17, 6783-6797.
- Klimesch, W. (1997). EEG-alpha rhythms and memory processes. *Int. J. Psychophysiol*. 26, 319-340.
- Le Van Quyen, M., Staba, R., Bragin, A., Dickson, C., Valderrama, M., Fried, I., and Engel, J. (2010). Large-scale microelectrode recordings of high-frequency gamma oscillations in human cortex during sleep. *The Journal of neuroscience : the official journal of the Society for Neuroscience* 30, 7770-7782.
- Leopold, D.A., Murayama, Y., and Logothetis, N.K. (2003). Very slow activity fluctuations in monkey visual cortex: implications for functional brain imaging. *Cereb. Cortex* 13, 422-433.
- Logothetis, N.K., Eschenko, O., Murayama, Y., Augath, M., Steudel, T., Evrard, H.C., Besserve, M., and Oeltermann, A. (2012). Hippocampal-cortical interaction during periods of subcortical silence. *Nature* 491, 547-553.
- Lopes da Silva, F.H., van Lierop, T.H., Schrijer, C.F., van Leeuwen, W.S. and (1973). Organization of thalamic and cortical alpha rhythms: spectra and coherences. *Electroencephalogr. Clin. Neurophysiol*. 35, 627- 639.
- Lopes da Silva, F.H., Vos, J.E., Mooibroek, J., and Van Rotterdam, A. (1980). Relative contributions of intracortical and thalamo-cortical processes in the generation of alpha rhythms, revealed by partial coherence analysis. *Electroencephalogr. Clin. Neurophysiol*. 50, 449- 456.
- Mukamel, R., Gelbard, H., Arieli, A., Hasson, U., Fried, I., and Malach, R. (2005). Coupling between neuronal firing, field potentials, and fMRI in human auditory cortex. *Science* 309, 951-954.
- Murthy, V.N., and Fetz, E.E. (1996). Oscillatory activity in sensorimotor cortex of awake monkeys: synchronization of local field potentials and relation to behavior. *J. Neurophysiol*. 76, 3949-3967.
- Nir, Y., Staba, R.J., Andrillon, T., Vyazovskiy, V.V., Cirelli, C., Fried, I., and Tononi, G. (2011). Regional slow waves and spindles in human sleep. *Neuron* 70, 153-169.
- Pfurtscheller, G., Stancák, A. Jr., and Neuper, C. (1996). Event-related synchronization (ERS) in the alpha band--an electrophysiological correlate of cortical idling: a review. *Int. J. Psychophysiol*. 24, 39-46.
- Pfurtscheller, G., Neuper, C., and Krausz, G. (2000). Functional dissociation of lower and upper frequency mu rhythms in relation to voluntary limb movement. *Clin. Neurophysiol*. 111, 1873-1879.
- Popa, D., Popescu, A.T., and Paré, D. (2009). Contrasting activity profile of two distributed cortical networks as a function of attentional demands. *J. Neurosci*. 29, 1191-1201.
- Raichle, M.E., MacLeod, A.M., Snyder, A.Z., Powers, W.J., Gusnard, D.A., and Shulman, G.L. (2001). A default mode of brain function. *Proc. Natl. Acad. Sci. USA* 98, 676-682.
- Raghavachari S, Lisman JE, Tully M, Madsen JR, Bromfield EB, Kahana MJ. (2006). Theta oscillations in human cortex during a working-memory task: evidence for local generators. *J Neurophysiol*. 95, 1630-1638.
- Ray, S., and Maunsell, J.H.R. (2011). Different origins of gamma rhythm and high-gamma activity in macaque visual cortex. *PLoS Biology* 9, e1000610, 1-15.
- Roelfsema, P.R., Engel, A.K., König, P., and Singer, W. (1997). Visuomotor integration is associated with zero time-lag synchronization among cortical areas. *Nature* 385, 157-161.
- Roux, F., Wibral, M., Mohr, H.M., Singer, W., and Uhlhaas, P.J. (2012). Gamma-band activity in human prefrontal cortex codes for the number of relevant items maintained in working memory. *J. Neurosci*. 32, 12411-12420.
- Salmelin, R., and Hari, R. (1994). Characterization of spontaneous MEG rhythms in healthy adults. *Electroencephalogr. Clin. Neurophysiol*. 91, 237-248.
- Sanchez-Vives, M.V., and McCormick, D.A. (2000). Cellular and network mechanisms of rhythmic recurrent activity in neocortex. *Nat. Neurosci*. 3, 1027-1034.
- Sigurdsson, T., Stark, K.L., Karayiorgou, M., Gogos, J.A., and Gordon, J.A. (2010). Impaired hippocampal-prefrontal synchrony in a genetic mouse model of schizophrenia. *Nature* 464, 763-767.
- Siapas, A.G., Lubenov, E.V., and Wilson, M.A. (2005). Prefrontal phase locking to hippocampal theta oscillations. *Neuron* 46, 141-151.
- Sirota, A., Csicsvari, J., Buhl, D., and Buzsáki, G. (2003). Communication between neocortex and hippocampus during sleep in rodents. *Proc. Natl. Acad. Sci. USA* 100, 2065-2069.
- Steriade, M., Nunez, A., and Amzica, F. (1993a). A novel slow (<1 Hz) oscillation of neocortical neurons in vivo: Depolarizing and hyperpolarizing components. *J. Neurosci*. 13, 3252-3265.
- Steriade, M., McCormick, D.A., and Sejnowski, T.J. (1993b). Thalamocortical oscillations in the sleeping and aroused brain. *Science* 262, 679-685.
- Tiihonen, J., Hari, R., Kajola, M., Karhu, J., Ahlfors, S., and Tassari, S. (1991). Magnetoencephalographic 10-Hz rhythm from the human auditory cortex. *Neurosci. Lett*. 129, 303-305.
- Timofeev, I., Grenier, F., Bazhenov, M., Sejnowski, T.J., and Steriade, M. (2000). Origin of slow cortical oscillations in deafferented cortical slabs. *Cereb. Cortex* 10, 1185-1199.

- Tort, A.B., Komorowski, R.W., Manns, J.R., Kopell, N.J., and Eichenbaum, H. (2009). Theta-gamma coupling increases during the learning of item-context associations. *Proceedings of the National Academy of Sciences of the United States of America* *106*, 20942-20947.
- Traub, R.D., Kopell, N., Bibbig, A., Buhl, E.H., LeBeau, F.E.N., and Whittington, M.A. (2001). Gap junctions between interneuron dendrites can enhance synchrony of gamma oscillations in distributed networks. *J. Neurosci.* *21*, 9478-9486.
- Traub, R.D., Whittington, M.A., Stanford, I.M., and Jefferys, J.G.R. (1996). A mechanism for generation of long-range synchronous fast oscillations in the cortex. *Nature* *383*, 621-624.
- Wang, X.J. (2010). Neurophysiological and computational principles of cortical rhythms in cognition. *Physiol. Rev.* *90*, 1195-1268.
- Whittingstall, K., and Logothetis, N. (2009). Frequency-band coupling in surface EEG reflects spiking activity in monkey visual cortex. *Neuron* *64*, 281-289.
- Wiest, M.C., and Nicolelis, M.A. (2003). Behavioral detection of tactile stimuli during 7-12 Hz cortical oscillations in awake rats. *Nat. Neurosci.* *6*, 913-914.
- Wilson, M.A., and McNaughton, B.L. (1994). Reactivation of hippocampal ensemble memories during sleep. *Science* *265*, 676-679.

**Supplementary Note 3.** References related to Figure 2 and the discussion of brain rhythms above are listed below. This selected list contains only in vivo experiments and typically drug free states. Numerous informative experiments have been carried out on the various oscillations in vitro as well, which are not listed here. The references are broken down into oscillatory patterns and species.

## Alpha/mu/tau oscillations

### Human

- Anderson, K.L., and Ding, M. (2011). Attentional modulation of the somatosensory mu rhythm. *Neuroscience* *180*, 165-180.
- Arroyo, S., Lesser, R.P., Gordon, B., Uematsu, S., Jackson, D., and Webber, R. (1993). Functional significance of the mu rhythm of human cortex: an electrophysiologic study with subdural electrodes. *Electroencephalography and clinical neurophysiology* *87*, 76-87.
- Basar, E., Schurmann, M., Basar-Eroglu, C., and Karakas, S. (1997). Alpha oscillations in brain functioning: an integrative theory. *International journal of psychophysiology : official journal of the International Organization of Psychophysiology* *26*, 5-29.
- Berger, H. (1929). Uber das Elektroencephalogramm des Menschen. *Arch. Psychiatr. Nervenkr. Arch. Psychiatr. Nervenkr* *87*, 527-570.
- Capotosto, P., Babiloni, C., Romani, G.L., and Corbetta, M. (2009). Frontoparietal cortex controls spatial attention through modulation of anticipatory alpha rhythms. *The Journal of neuroscience : the official journal of the Society for Neuroscience* *29*, 5863-5872.
- Ciulla, C., Takeda, T., and Endo, H. (1999). MEG characterization of spontaneous alpha rhythm in the human brain. *Brain topography* *11*, 211-222.
- Gastaut, H.J., and Bert, J. (1954). EEG changes during cinematographic presentation; moving picture activation of the EEG. *Electroencephalography and clinical neurophysiology* *6*, 433-444.
- Hanslmayr, S., Gross, J., Klimesch, W., and Shapiro, K.L. (2011). The role of alpha oscillations in temporal attention. *Brain research reviews* *67*, 331-343.
- Hari, R. (2006). Action-perception connection and the cortical mu rhythm. *Progress in brain research* *159*, 253-260.
- Jones, S.R., Pritchett, D.L., Sikora, M.A., Stufflebeam, S.M., Hamalainen, M., and Moore, C.I. (2009). Quantitative analysis and biophysically realistic neural modeling of the MEG mu rhythm: rhythmogenesis and modulation of sensory-evoked responses. *Journal of neurophysiology* *102*, 3554-3572.
- Klimesch, W. (1996). Memory processes, brain oscillations and EEG synchronization. *International journal of psychophysiology : official journal of the International Organization of Psychophysiology* *24*, 61-100.
- Klimesch, W. (2012). alpha-band oscillations, attention, and controlled access to stored information. *Trends in cognitive sciences* *16*, 606-617.
- Klimesch, W., Sauseng, P., and Hanslmayr, S. (2007). EEG alpha oscillations: the inhibition-timing hypothesis. *Brain research reviews* *53*, 63-88.
- Makeig, S., Westerfield, M., Jung, T.P., Enghoff, S., Townsend, J., Courchesne, E., and Sejnowski, T.J. (2002). Dynamic brain sources of visual evoked responses. *Science* *295*, 690-694.
- Niedermeyer, E. (1990). Alpha-like rhythmical activity of the temporal lobe. *Clin Electroencephalogr* *21*, 210-224.



Niedermeyer, E. (1997). Alpha rhythms as physiological and abnormal phenomena. *International journal of psychophysiology : official journal of the International Organization of Psychophysiology* 26, 31-49.

Palva, S., and Palva, J.M. (2011). Functional roles of alpha-band phase synchronization in local and large-scale cortical networks. *Frontiers in psychology* 2, 204.

Petsche, H., Kaplan, S., von Stein, A., and Filz, O. (1997). The possible meaning of the upper and lower alpha frequency ranges for cognitive and creative tasks. *International Journal of Psychophysiology* 26, 77-97.

Pfurtscheller, G., Stancak, A., Jr., and Neuper, C. (1996). Event-related synchronization (ERS) in the alpha band--an electrophysiological correlate of cortical idling: a review. *International Journal of Psychophysiology* 24, 39-46.

Ritter, P., Moosmann, M., and Villringer, A. (2009). Rolandic alpha and beta EEG rhythms' strengths are inversely related to fMRI-BOLD signal in primary somatosensory and motor cortex. *Human brain mapping* 30, 1168-1187.

Thut, G., Nietzel, A., Brandt, S.A., and Pascual-Leone, A. (2006). Alpha-band electroencephalographic activity over occipital cortex indexes visuospatial attention bias and predicts visual target detection. *The Journal of Neuroscience* 26, 9494-9502.

Tiihonen, J., Hari, R., Kajola, M., Karhu, J., Ahlfors, S., and Tissari, S. (1991). Magnetoencephalographic 10-Hz rhythm from the human auditory cortex. *Neuroscience letters* 129, 303-305.

Velasco, M., Berrondo, L., Olvera, A., and Velasco, F. (1975). Somatic evoked response components and recovery functions in subjects with mu and alpha rhythms. *Journal of neuroscience research* 1, 151-160.

Voytek, B., Canolty, R.T., Shestyuk, A., Crone, N.E., Parvizi, J., and Knight, R.T. (2010). Shifts in gamma phase-amplitude coupling frequency from theta to alpha over posterior cortex during visual tasks. *Frontiers in human neuroscience* 4, 191.

## Chimpanzee

Achermann, P., and Borbely, A.A. (1998). Coherence analysis of the human sleep electroencephalogram. *Neuroscience* 85, 1195-1208.

Bert, J., Kripke, D.F., and Rhodes, J. (1970). Electroencephalogram of the mature chimpanzee: twenty-four hour recordings. *Electroencephalography and clinical neurophysiology* 28, 368-373.

Ciulla, C., Takeda, T., and Endo, H. (1999). MEG characterization of spontaneous alpha rhythm in the human brain. *Brain topography* 11, 211-222.

Freeman, W.J., Holmes, M.D., West, G.A., and Vanhatalo, S. (2006). Fine spatiotemporal structure of phase in human intracranial EEG. *Clinical neurophysiology : official journal of the International Federation of Clinical Neurophysiology* 117, 1228-1243.

Jurko, M.F., Giurintano, L.P., Giurintano, S.L., and Andy, O.J. (1974). Spontaneous awake EEG patterns in three lines of primate evolution. *Behavioral biology* 10, 377-384.

Sherratt, R.M., and Gibberd, F.B. (1974). Motor neurone disease and dementia: probably Creutzfeldt-Jakob disease. *Proceedings of the Royal Society of Medicine* 67, 1063-1064.

## Monkey

Bollimunta, A., Chen, Y., Schroeder, C.E., and Ding, M. (2008). Neuronal mechanisms of cortical alpha oscillations in awake-behaving macaques. *The Journal of Neuroscience* 28, 9976-9988.

Haegens, S., Nacher, V., Luna, R., Romo, R., and Jensen, O. (2011). alpha-Oscillations in the monkey sensorimotor network influence discrimination performance by rhythmical inhibition of neuronal spiking. *Proceedings of the National Academy of Sciences of the United States of America* 108, 19377-19382.

Premereur, E., Vanduffel, W., Roelfsema, P.R., and Janssen, P. (2012). Frontal eye field microstimulation induces task-dependent gamma oscillations in the lateral intraparietal area. *Journal of neurophysiology* 108, 1392-1402.

## Dog

da Silva, F.H., van Lierop, T.H., Schrijer, C.F., and van Leeuwen, W.S. (1973a). Essential differences between alpha rhythms and barbiturate spindles: spectra and thalamo-cortical coherences. *Electroencephalography and clinical neurophysiology* 35, 641-645.

da Silva, F.H., van Lierop, T.H., Schrijer, C.F., and van Leeuwen, W.S. (1973b). Organization of thalamic and cortical alpha rhythms: spectra and coherences. *Electroencephalography and clinical neurophysiology* 35, 627-639.

Dumenko, V.N. (1995). Dynamic shifts in the parameters of the traditional frequency range of the EEG during learning in dogs. *Neuroscience and behavioral physiology* 25, 403-412.

Hogan, K., and Fitzpatrick, J. (1988). The cerebral origin of the alpha rhythm. *Electroencephalography and clinical neurophysiology* 69, 79-81.

Lopes da Silva, F.H., Vos, J.E., Mooibroek, J., and Van Rotterdam, A. (1980). Relative contributions of intracortical and thalamo-cortical processes in the generation of alpha rhythms, revealed by partial coherence analysis. *Electroencephalography and clinical neurophysiology* 50, 449-456.

## Cat

Bouyer, J.J., Rougeul, A., and Buser, P. (1982). Somatosensory rhythms in the awake cat: a single unit exploration of their thalamic concomitant in nucleus ventralis posterior and vicinity. *Archives italiennes de biologie* 120, 95-110.

Chatila, M., Milleret, C., Buser, P., and Rougeul, A. (1992). A 10 Hz "alpha-like" rhythm in the visual cortex of the waking cat. *Electroencephalography and clinical neurophysiology* 83, 217-222.

Hughes, S.W., Lorincz, M.L., Blethyn, K., Kekesi, K.A., Juhasz, G., Turmaine, M., Parnavelas, J.G., and Crunelli, V. (2011). Thalamic Gap Junctions Control Local Neuronal Synchrony and Influence Macroscopic Oscillation Amplitude during EEG Alpha Rhythms. *Frontiers in psychology* 2, 193.

Lorincz, M.L., Kekesi, K.A., Juhasz, G., Crunelli, V., and Hughes, S.W. (2009). Temporal framing of thalamic relay-mode firing by phasic inhibition during the alpha rhythm. *Neuron* 63, 683-696.

Schurmann, M., Basar-Eroglu, C., and Basar, E. (1998). Evoked EEG alpha oscillations in the cat brain--a correlate of primary sensory processing? *Neuroscience letters* 240, 41-44.

Schurmann, M., Demiralp, T., Basar, E., and Basar Eroglu, C. (2000). Electroencephalogram alpha (8-15 Hz) responses to visual stimuli in cat cortex, thalamus, and hippocampus: a distributed alpha network? *Neuroscience letters* 292, 175-178.

## Rabbit

Barrie, J.M., Freeman, W.J., and Lenhart, M.D. (1996). Spatiotemporal analysis of prepyriform, visual, auditory, and somesthetic surface EEGs in trained rabbits. *Journal of neurophysiology* 76, 520-539.

## Rat

Buzsáki, G., Bickford, R.G., Ponomareff, G., Thal, L.J., Mandel, R., and Gage, F.H. (1988). Nucleus basalis and thalamic control of neocortical activity in the freely moving rat. *The Journal of neuroscience : the official journal of the Society for Neuroscience* 8, 4007-4026.

Coenen, A.M., and Van Luijtelaar, E.L. (1987). The WAG/Rij rat model for absence epilepsy: age and sex factors. *Epilepsy research* 1, 297-301.

Depaulis, A., Vergnes, M., and Marescaux, C. (1994). Endogenous control of epilepsy: the nigral inhibitory system. *Progress in neurobiology* 42, 33-52.

Jando, G., Carpi, D., Kandel, A., Urioste, R., Horvath, Z., Pierre, E., Vadi, D., Vadasz, C., and Buzsáki, G. (1995). Spike-and-wave epilepsy in rats: sex differences and inheritance of physiological traits. *Neuroscience* 64, 301-317.

Kandel, A., and Buzsáki, G. (1997). Cellular-synaptic generation of sleep spindles, spike-and-wave discharges, and evoked thalamocortical responses in the neocortex of the rat. *The Journal of neuroscience : the official journal of the Society for Neuroscience* 17, 6783-6797.

Kaplan, B.J. (1985). The epileptic nature of rodent electrocortical polyspiking is still unproven. *Experimental neurology* 88, 425-436.

Loscher, W. (1984). Genetic animal models of epilepsy as a unique resource for the evaluation of anticonvulsant drugs. A review. *Methods and findings in experimental and clinical pharmacology* 6, 531-547.

Marescaux, C., Vergnes, M., and Depaulis, A. (1992). Genetic absence epilepsy in rats from Strasbourg--a review. *Journal of neural transmission. Supplementum* 35, 37-69.

van Luijtelaar, E.L. (1997). Spike-wave discharges and sleep spindles in rats. *Acta neurobiologiae experimentalis* 57, 113-121.

van Luijtelaar, E.L., and Coenen, A.M. (1986). Two types of electrocortical paroxysms in an inbred strain of rats. *Neuroscience letters* 70, 393-397.

Wiest, M.C., and Nicolelis, M.A. (2003). Behavioral detection of tactile stimuli during 7-12 Hz cortical oscillations in awake rats. *Nature neuroscience* 6, 913-914.

## Sleep spindles

### Humans

Clemens, Z., Mölle, M., Eross, L., Barsi, P., Halász, P., and Born, J. (2007). Temporal coupling of parahippocampal ripples, sleep spindles and slow oscillations in humans. *Brain : a journal of neurology* 130, 2868-2878.

Clemens, Z., Mölle, M., Eross, L., Jakus, R., Rasonyi, G., Halász, P., and Born, J. (2011). Fine-tuned coupling between human parahippocampal ripples and sleep spindles. *The European journal of neuroscience* 33, 511-520.

De Gennaro, L., and Ferrara, M. (2003). Sleep spindles: an overview. *Sleep medicine reviews* 7, 423-440.

Dehghani, N., Cash, S.S., and Halgren, E. (2011a). Emergence of synchronous EEG spindles from asynchronous MEG spindles. *Human brain mapping* 32, 2217-2227.

Dehghani, N., Cash, S.S., and Halgren, E. (2011b). Topographical frequency dynamics within EEG and MEG sleep spindles. *Clinical neurophysiology : official journal of the International Federation of Clinical Neurophysiology* 122, 229-235.

Ferrarelli, F., Huber, R., Peterson, M.J., Massimini, M., Murphy, M., Riedner, B.A., Watson, A., Bria, P., and Tononi, G. (2007). Reduced sleep spindle activity in schizophrenia patients. *The American journal of psychiatry* 164, 483-492.

Gais, S., Mölle, M., Helms, K., and Born, J. (2002). Learning-dependent increases in sleep spindle density. *The Journal of neuroscience : the official journal of the Society for Neuroscience* 22, 6830-6834.

Gibbs, F.A., and Gibbs, E.L. (1950). *Atlas of electroencephalography*. (Cambridge, Mass., Addison-Wesley Press), p. and metal box with 52 EEG foldouts.

Gottselig, J.M., Bassetti, C.L., and Achermann, P. (2002). Power and coherence of sleep spindle frequency activity following hemispheric stroke. *Brain : a journal of neurology* 125, 373-383.

Himanen, S.L., Virkkala, J., Huhtala, H., and Hasan, J. (2002). Spindle frequencies in sleep EEG show U-shape within first four NREM sleep episodes. *Journal of sleep research* 11, 35-42.

Jankel, W.R., and Niedermeyer, E. (1985). Sleep spindles. *Journal of clinical neurophysiology : official publication of the American Electroencephalographic Society* 2, 1-35.

Loomis, A.L., Harvey, E.N., and Hobart, G. (1935). Potential Rhythms of the Cerebral Cortex during Sleep. *Science* 81, 597-598.

Nir, Y., Staba, R.J., Andrillon, T., Vyazovskiy, V.V., Cirelli, C., Fried, I., and Tononi, G. (2011). Regional slow waves and spindles in human sleep. *Neuron* 70, 153-169.

Schabus, M., Gruber, G., Parapatics, S., Sauter, C., Klosch, G., Anderer, P., Klimesch, W., Saletu, B., and Zeitlhofer, J. (2004). Sleep spindles and their significance for declarative memory consolidation. *Sleep* 27, 1479-1485.

Wamsley, E.J., Tucker, M.A., Shinn, A.K., Ono, K.E., McKinley, S.K., Ely, A.V., Goff, D.C., Stickgold, R., and Manoach, D.S. (2012). Reduced sleep spindles and spindle coherence in schizophrenia: mechanisms of impaired memory consolidation? *Biological psychiatry* 71, 154-161.

## Dolphin

Mukhametov LM, Supin A. (1975) [An EEG study of different behavioral states of freely moving dolphins]. [Article in Russian] *Zh Vyssh Nerv Deiat Im I P Pavlova*. 25, 396-401.

## Monkey

Nieuwenhuis I. L. C., Bosman C. A., Oostenveld R., Born J. and Fries P. (2010) Monkey high density electrocorticogram (ECoG) reveals sleep spindle diversity. *FENS Abstr.*, vol.5, 130.56.

Hsieh KC, Robinson EL, Fuller CA. (2008) Sleep architecture in unrestrained rhesus monkeys (*Macaca mulatta*) synchronized to 24-hour light-dark cycles. *Sleep* 31, 1239-1250.

## Swine

Forslid, A., Andersson, B., and Johansson, S. (1986). Observations on normal EEG activity in different brain regions of the unrestrained swine. *Acta physiologica Scandinavica* 128, 389-396.

## Cat

Contreras, D., Destexhe, A., and Steriade, M. (1997). Spindle oscillations during cortical spreading depression in naturally sleeping cats. *Neuroscience* 77, 933-936.

Gottesmann, C., Gandolfo, G., and Zernicki, B. (1984). Intermediate stage of sleep in the cat. *Journal de physiologie* 79, 365-372.

Nunez, A., Curro Dossi, R., Contreras, D., and Steriade, M. (1992). Intracellular evidence for incompatibility between spindle and delta oscillations in thalamocortical neurons of cat. *Neuroscience* 48, 75-85.

Steriade, M., and Deschenes, M. (1984). The thalamus as a neuronal oscillator. *Brain research* 320, 1-63.

Steriade, M., McCormick, D.A., and Sejnowski, T.J. (1993). Thalamocortical oscillations in the sleeping and aroused brain. *Science* 262, 679-685.

## Rabbit

Kawakami, M., and Sawyer, C.H. (1959). Induction of behavioral and electroencephalographic changes in the rabbit by hormone administration or brain stimulation. *Endocrinology* 65, 631-643.

## Rat

Eschenko, O., Mölle, M., Born, J., and Sara, S.J. (2006). Elevated sleep spindle density after learning or after retrieval in rats. *The Journal of neuroscience : the official journal of the Society for Neuroscience* 26, 12914-12920.

Gais, S., Mölle, M., Helms, K., and Born, J. (2002). Learning-dependent increases in sleep spindle density. *The Journal of neuroscience : the official journal of the Society for Neuroscience* 22, 6830-6834.

Gandolfo, G., Gauthier, P., Arnaud, C., and Gottesmann, C. (1996). Influence of paradoxical sleep deprivation on the intermediate stage of sleep in the rat. *Neuroscience research* 25, 123-127.

Gandolfo, G., Scherschlicht, R., and Gottesmann, C. (1994). Benzodiazepines promote the intermediate stage at the expense of paradoxical sleep in the rat. *Pharmacology, biochemistry, and behavior* 49, 921-927.

- Gottesmann, C. (1973). [Intermediate stages of sleep in the rat]. *Revue d'electroencephalographie et de neurophysiologie clinique* 3, 65-68.
- Kandel, A., and Buzsáki, G. (1997). Cellular-synaptic generation of sleep spindles, spike-and-wave discharges, and evoked thalamocortical responses in the neocortex of the rat. *The Journal of neuroscience : the official journal of the Society for Neuroscience* 17, 6783-6797.
- Mölle, M., Eschenko, O., Gais, S., Sara, S.J., and Born, J. (2009). The influence of learning on sleep slow oscillations and associated spindles and ripples in humans and rats. *The European journal of neuroscience* 29, 1071-1081.
- Peyrache, A., Battaglia, F.P., and Destexhe, A. (2011). Inhibition recruitment in prefrontal cortex during sleep spindles and gating of hippocampal inputs. *Proceedings of the National Academy of Sciences of the United States of America* 108, 17207-17212.
- Siapas, A.G., and Wilson, M.A. (1998). Coordinated interactions between hippocampal ripples and cortical spindles during slow-wave sleep. *Neuron* 21, 1123-1128.
- Sirota, A., Csicsvari, J., Buhl, D., and Buzsáki, G. (2003). Communication between neocortex and hippocampus during sleep in rodents. *Proceedings of the National Academy of Sciences of the United States of America* 100, 2065-2069.
- Terrier, G., and Gottesmann, C.L. (1978). Study of cortical spindles during sleep in the rat. *Brain research bulletin* 3, 701-706.
- Watts, A., Gritton, H.J., Sweigart, J., and Poe, G.R. (2012). Antidepressant suppression of non-REM sleep spindles and REM sleep impairs hippocampus-dependent learning while augmenting striatum-dependent learning. *The Journal of neuroscience : the official journal of the Society for Neuroscience* 32, 13411-13420.

## Mouse

- Astori, S., Wimmer, R.D., Prosser, H.M., Corti, C., Corsi, M., Liaudet, N., Volterra, A., Franken, P., Adelman, J.P., and Luthi, A. (2011). The Ca(V)3.3 calcium channel is the major sleep spindle pacemaker in thalamus. *Proceedings of the National Academy of Sciences of the United States of America* 108, 13823-13828.
- Glin, L., Arnaud, C., Berracochea, D., Galey, D., Jaffard, R., and Gottesmann, C. (1991). The intermediate stage of sleep in mice. *Physiology & behavior* 50, 951-953.
- Vyazovskiy, V.V., Achermann, P., Borbely, A.A., and Tobler, I. (2004). The dynamics of spindles and EEG slow-wave activity in NREM sleep in mice. *Archives italiennes de biologie* 142, 511-523.
- Wimmer, R.D., Astori, S., Bond, C.T., Rovo, Z., Chatton, J.Y., Adelman, J.P., Franken, P., and Luthi, A. (2012). Sustaining sleep spindles through enhanced SK2-channel activity consolidates sleep and elevates arousal threshold. *The Journal of neuroscience : the official journal of the Society for Neuroscience* 32, 13917-13928.

## Theta

(only references related to the entorhinal-hippocampal theta are listed)

## Human

- Addante, R.J., Watrous, A.J., Yonelinas, A.P., Ekstrom, A.D., and Ranganath, C. (2011). Prestimulus theta activity predicts correct source memory retrieval. *Proceedings of the National Academy of Sciences of the United States of America* 108, 10702-10707.
- Arnolds, D.E., Lopes da Silva, F.H., Aitink, J.W., Kamp, A., and Boeijinga, P. (1980). The spectral properties of hippocampal EEG related to behaviour in man. *Electroencephalography and clinical neurophysiology* 50, 324-328.
- Axmacher, N., Cohen, M.X., Fell, J., Haupt, S., Dumpelmann, M., Elger, C.E., Schlaepfer, T.E., Lenartz, D., Sturm, V., and Ranganath, C. (2010a). Intracranial EEG correlates of expectancy and memory formation in the human hippocampus and nucleus accumbens. *Neuron* 65, 541-549.
- Axmacher, N., Henseler, M.M., Jensen, O., Weinreich, I., Elger, C.E., and Fell, J. (2010b). Cross-frequency coupling supports multi-item working memory in the human hippocampus. *Proceedings of the National Academy of Sciences of the United States of America* 107, 3228-3233.
- Bodizs, R., Kantor, S., Szabo, G., Szucs, A., Eross, L., and Halász, P. (2001). Rhythmic hippocampal slow oscillation characterizes REM sleep in humans. *Hippocampus* 11, 747-753.
- Brazier, M.A. (1968). Studies of the EEG activity of limbic structures in man. *Electroencephalography and clinical neurophysiology* 25, 309-318.
- Cantero, J.L., Atienza, M., Stickgold, R., Kahana, M.J., Madsen, J.R., and Kocsis, B. (2003). Sleep-dependent theta oscillations in the human hippocampus and neocortex. *The Journal of neuroscience : the official journal of the Society for Neuroscience* 23, 10897-10903.
- de Araujo, D.B., Baffa, O., and Wakai, R.T. (2002). Theta oscillations and human navigation: a magnetoencephalography study. *Journal of cognitive neuroscience* 14, 70-78.
- Ekstrom, A.D., Caplan, J.B., Ho, E., Shattuck, K., Fried, I., and Kahana, M.J. (2005). Human hippocampal theta activity during virtual navigation. *Hippocampus* 15, 881-889.
- Griesmayr, B., Gruber, W.R., Klimesch, W., and Sauseng, P. (2010). Human frontal midline theta and its synchronization to gamma during a verbal delayed match to sample task. *Neurobiology of learning and memory* 93, 208-215.
- Halgren, E., Babb, T.L., and Crandall, P.H. (1978). Human hippocampal formation EEG desynchronizes during attentiveness and movement. *Electroencephalography and clinical neurophysiology* 44, 778-781.

Kaplan, R., Doeller, C.F., Barnes, G.R., Litvak, V., Duzel, E., Bandettini, P.A., and Burgess, N. (2012). Movement-related theta rhythm in humans: coordinating self-directed hippocampal learning. *PLoS biology* 10, e1001267.

Lega, B.C., Jacobs, J., and Kahana, M. (2012). Human hippocampal theta oscillations and the formation of episodic memories. *Hippocampus* 22, 748-761.

Mormann, F., Fell, J., Axmacher, N., Weber, B., Lehnertz, K., Elger, C.E., and Fernandez, G. (2005). Phase/amplitude reset and theta-gamma interaction in the human medial temporal lobe during a continuous word recognition memory task. *Hippocampus* 15, 890-900.

Mormann, F., Osterhage, H., Andrzejak, R.G., Weber, B., Fernandez, G., Fell, J., Elger, C.E., and Lehnertz, K. (2008). Independent delta/theta rhythms in the human hippocampus and entorhinal cortex. *Frontiers in human neuroscience* 2, 3.

Rutishauser, U., Ross, I.B., Mamelak, A.N., and Schuman, E.M. (2010). Human memory strength is predicted by theta-frequency phase-locking of single neurons. *Nature* 464, 903-907.

Steinvorth, S., Wang, C., Ulbert, I., Schomer, D., and Halgren, E. (2010). Human entorhinal gamma and theta oscillations selective for remote autobiographical memory. *Hippocampus* 20, 166-173.

Tesche, C.D., and Karhu, J. (2000). Theta oscillations index human hippocampal activation during a working memory task. *Proceedings of the National Academy of Sciences of the United States of America* 97, 919-924.

Watrous, A.J., Fried, I., and Ekstrom, A.D. (2011). Behavioral correlates of human hippocampal delta and theta oscillations during navigation. *Journal of neurophysiology* 105, 1747-1755.

Watrous, A.J., Lee, D.J., Izadi, A., Gurfkoff, G.G., Shahaie, K., and Ekstrom, A.D. (2013). A comparative study of human and rat hippocampal low-frequency oscillations during spatial navigation. *Hippocampus* 23, 656-661.

White, D.J., Congedo, M., Ciorciari, J., and Silberstein, R.B. (2012). Brain oscillatory activity during spatial navigation: theta and gamma activity link medial temporal and parietal regions. *Journal of cognitive neuroscience* 24, 686-697.

## Monkey

Jutras, M.J., Fries, P., and Buffalo, E.A. (2013). Oscillatory activity in the monkey hippocampus during visual exploration and memory formation. *Proceedings of the National Academy of Sciences of the United States of America* 110, 13144-13149.

Lee, H., Simpson, G.V., Logothetis, N.K., and Rainer, G. (2005). Phase locking of single neuron activity to theta oscillations during working memory in monkey extrastriate visual cortex. *Neuron* 45, 147-156.

Stewart, M., and Fox, S.E. (1991). Hippocampal theta activity in monkeys. *Brain research* 538, 59-63.

## Swine

Forslid, A., Andersson, B., and Johansson, S. (1986). Observations on normal EEG activity in different brain regions of the unrestrained swine. *Acta physiologica Scandinavica* 128, 389-396.

## Dog

Arnolds, D.E., Lopes da Silva, F.H., Aitink, J.W., and Kamp, A. (1979a). Hippocampal EEG and behaviour in dog. I. Hippocampal EEG correlates of gross motor behaviour. *Electroencephalography and clinical neurophysiology* 46, 552-570.

Arnolds, D.E., Lopes da Silva, F.H., Aitink, J.W., and Kamp, A. (1979b). Hippocampal EEG and behaviour in dog. II. Hippocampal EEG correlates with elementary motor acts. *Electroencephalography and clinical neurophysiology* 46, 571-580.

Arnolds, D.E., Lopes da Silva, F.H., Aitink, J.W., and Kamp, A. (1979c). Hippocampal EEG and behaviour in dog. III. Hippocampal EEG correlates of stimulus-response tasks and of sexual behaviour. *Electroencephalography and clinical neurophysiology* 46, 581-591.

Black, A.H., Young, G.A., and Batenchuk, C. (1970). Avoidance training of hippocampal theta waves in flaxedilized dogs and its relation to skeletal movement. *Journal of comparative and physiological psychology* 70, 15-24.

Lopes da Silva, F.H., Storm van Leeuwen, W., and de Wied, D. (1974). A frequency shift in the hippocampal theta activity: an electrical correlate of central action of ACTH analogues in the dog? *Brain research* 69, 361-365.

Lucas, E.A., Powell, E.W., and Murphree, O.D. (1974). Hippocampal theta in nervous pointer dogs. *Physiology & behavior* 12, 609-613.

Preobrazhenskaia, L.A. (1974). [Hippocampal theta rhythm and motor activity]. *Zhurnal vysshei nervnoi deiatelnosti imeni I P Pavlova* 24, 227-235.

Shimazono, Y., Horie, T., Hori, N., Chikazawa, S., Okabe, M., and Hayashi, M. (1965). On the "hippocampal rhythmic waves" in acute and chronic experiments in dogs. *International journal of neurology* 5, 151-167.

Wauquier, A., Verheyen, J.L., van den Broeck, W.A., and Janssen, P.A. (1979). Visual and computer-based analysis of 24 h sleep-waking patterns in the dog. *Electroencephalography and clinical neurophysiology* 46, 33-48.

## Cat

Adey, W.R. (1967). Hippocampal states and functional relations with corticosubcortical systems in attention and learning. *Progress in brain research* 27, 228-245.

- Adey, W.R., Dunlop, C.W., and Hendrix, C.E. (1960). Hippocampal slow waves. Distribution and phase relationships in the course of approach learning. *Archives of neurology* 3, 74-90.
- Adey, W.R., Sunderland, S., and Dunlop, C.W. (1957). The entorhinal area; electrophysiological studies of its interrelations with rhinencephalic structures and the brainstem. *Electroencephalography and clinical neurophysiology* 9, 309-324.
- Arnolds, D.E., Lopes da Silva, F.H., Boeijinga, P., Kamp, A., and Aitink, W. (1984). Hippocampal EEG and motor activity in the cat: the role of eye movements and body acceleration. *Behavioural brain research* 12, 121-135.
- Azzaroni, A., and Parmeggiani, P.L. (1968). Papez circuit and regulation of the hippocampal theta rhythm in the cat. *Electroencephalography and clinical neurophysiology* 25, 84-85.
- Bennett, T.L., and French, J. (1977). Electrical activity of the cat hippocampus during the species-typical gape response: evidence against the voluntary movement hypothesis. *Behavioral biology* 21, 432-437.
- Bennett, T.L., Nunn, P.J., and Inman, D.P. (1971). Effects of scopolamine on hippocampal theta and correlated discrimination performance. *Physiology & behavior* 7, 451-454.
- Bland, B.H., Sainsbury, R.S., and Creery, B.L. (1979). Anatomical correlates of rhythmical slow wave activity (theta) in the hippocampal formation of the cat. *Brain research* 161, 199-209.
- Bressler, S.L., and Freeman, W.J. (1980). Frequency analysis of olfactory system EEG in cat, rabbit, and rat. *Electroencephalography and clinical neurophysiology* 50, 19-24.
- Brown, B.B. (1968). Frequency and phase of hippocampal theta activity in the spontaneously behaving cat. *Electroencephalography and clinical neurophysiology* 24, 53-62.
- Coleman, J.R., and Lindsley, D.B. (1975). Hippocampal electrical correlates of free behavior and behavior induced by stimulation of two hypothalamic-hippocampal systems in the cat. *Experimental neurology* 49, 506-528.
- Demiralp, T., Basar-Eroglu, C., Rahn, E., and Basar, E. (1994). Event-related theta rhythms in cat hippocampus and prefrontal cortex during an omitted stimulus paradigm. *International journal of psychophysiology : official journal of the International Organization of Psychophysiology* 18, 35-48.
- Golebiewski, H., Eckersdorf, B., and Konopacki, J. (1999). The effect of intraseptal procaine injection of hippocampal theta in freely moving cat. *Brain research bulletin* 49, 407-412.
- Gottesmann, C., Zernicki, B., and Gandolfo, G. (1981). Hippocampal theta activity in the acute cerveau isole cat. *Acta neurobiologiae experimentalis* 41, 251-255.
- Grastyán, E., and Karmos, G. (1961). A study of a possible "dreaming" mechanism in the cat. *Acta physiologica Academiae Scientiarum Hungaricae* 20, 41-50.
- Grastyán, E., Karmos, G., Vereczkey, L., and Kellényi, L. (1966). The hippocampal electrical correlates of the homeostatic regulation of motivation. *Electroencephalography and clinical neurophysiology* 21, 34-53.
- Grastyán, E., Karmos, G., Vereczkey, L., Martin, J., and Kellényi, L. (1965). Hypothalamic Motivational Processes as Reflected by their Hippocampal Electrical Correlates. *Science* 149, 91-93.
- Grastyán, E., Lissak, K., Madarasz, I., and Donhoff, H. (1959). Hippocampal electrical activity during the development of conditioned reflexes. *Electroencephalography and clinical neurophysiology* 11, 409-430.
- Lissak, K., Karmos, G., and Grastyán, E. (1962). A peculiar dreamlike stage of sleep in the cat. *Activitas nervosa superior* 4, 347-352.
- Olmstead, C.E., and Villablanca, J.R. (1977). Hippocampal theta rhythm persists in the permanently isolated forebrain of the cat. *Brain research bulletin* 2, 93-100.
- Oniani, T.N., Koridze, M.G., and Abzianidze, H.V. (1972). Electrical activity of the hippocampus during delayed responses and hypothalamic stimulation in the cat. *Acta neurobiologiae experimentalis* 32, 799-816.
- Radil-Weiss, T., Zernicki, B., and Michalski, A. (1976). Hippocampal theta activity in the acute pretrigeminal cat. *Acta neurobiologiae experimentalis* 36, 517-534.
- Wilson, C.L., Motter, B.C., and Lindsley, D.B. (1976). Influences of hypothalamic stimulation upon septal and hippocampal electrical activity in the cat. *Brain research* 107, 55-68.

## Sheep

Ge, T., Kendrick, K.M., and Feng, J. (2009). A novel extended Granger Causal Model approach demonstrates brain hemispheric differences during face recognition learning. *PLoS computational biology* 5, e1000570.

Kendrick, K.M., Zhan, Y., Fischer, H., Nicol, A.U., Zhang, X., and Feng, J. (2011). Learning alters theta amplitude, theta-gamma coupling and neuronal synchronization in inferotemporal cortex. *BMC neuroscience* 12, 55.

## Rabbit

Artemenko, D.P. (1972). [Participation of hippocampal neurons in the generation of theta waves]. *Neirofiziologiia = Neurophysiology* 4, 531-539.

- Berry, S.D., Rinaldi, P.C., Thompson, R.F., and Verzeano, M. (1978). Analysis of temporal relations among units and slow waves in rabbit hippocampus. *Brain research bulletin* 3, 509-518.
- Bland, B.H. (1986). The physiology and pharmacology of hippocampal formation theta rhythms. *Progress in neurobiology* 26, 1-54.
- Bland, B.H., Andersen, P., Ganes, T., and Sveen, O. (1980). Automated analysis of rhythmicity of physiologically identified hippocampal formation neurons. *Experimental brain research. Experimentelle Hirnforschung. Experimentation cerebrale* 38, 205-219.
- Bland, B.H., Anderson, P., and Ganes, T. (1975). Two generators of hippocampal theta activity in rabbits. *Brain research* 94, 199-218.
- Fujita, Y., and Sato, T. (1964). Intracellular Records from Hippocampal Pyramidal Cells in Rabbit during Theta Rhythm Activity. *Journal of neurophysiology* 27, 1012-1025.
- Gogolak, G., Stumpf, C., Petsche, H., and Sterc, J. (1968). The firing pattern of septal neurons and the form of the hippocampal theta wave. *Brain research* 7, 201-207.
- Green, J.D., and Arduini, A.A. (1954). Hippocampal electrical activity in arousal. *Journal of neurophysiology* 17, 533-557.
- Jung, R.K.A. (1938). Eine Methodik der ableitung lokalisierter Potentialschwankungen aus subcorticalen Hirngebieten. *Arch Psychiat Nervenkr* 109, 1-30.
- Klemm, W.R. (1976). Physiological and behavioral significance of hippocampal rhythmic, slow activity ("theta rhythm"). *Progress in neurobiology* 6, 23-47.
- Kramis, R., Vanderwolf, C.H., and Bland, B.H. (1975). Two types of hippocampal rhythmical slow activity in both the rabbit and the rat: relations to behavior and effects of atropine, diethyl ether, urethane, and pentobarbital. *Experimental neurology* 49, 58-85.
- Nokia, M.S., Penttonen, M., Korhonen, T., and Wikgren, J. (2009). Hippocampal theta-band activity and trace eyeblink conditioning in rabbits. *Behavioral neuroscience* 123, 631-640.
- Petsche, H., Gogolak, G., and Stumpf, C. (1968). Septal unit firing and the shape of theta waves in the rabbit's hippocampus. *Electroencephalography and clinical neurophysiology* 24, 390.
- Whishaw, I.Q. (1976). The effects of alcohol and atropine on EEG and behavior in the rabbit. *Psychopharmacology* 48, 83-90.
- Winson, J. (1972). Interspecies differences in the occurrence of theta. *Behavioral biology* 7, 479-487.
- Winson, J. (1976). Hippocampal theta rhythm. II. Depth profiles in the freely moving rabbit. *Brain research* 103, 71-79.

## Gerbil

- Araki, H., Nojiri, M., Kawashima, K., Kimura, M., and Aihara, H. (1986). Behavioral, electroencephalographic and histopathological studies on mongolian gerbils with occluded common carotid arteries. *Physiology & behavior* 38, 89-94.
- Stark, H., Rothe, T., Deliano, M., and Scheich, H. (2007). Theta activity attenuation correlates with avoidance learning progress in gerbils. *Neuroreport* 18, 549-552.
- Thomson, M.A., Pellet-Gondret, M.H., Willig, F., M'Harzi, M., and Monmaur, P. (1988). Effects of unilateral cerebral ischemia on the hippocampal theta depth profile in the ether-anesthetized Mongolian gerbil. *Experimental neurology* 99, 225-233.

## Guinea pig

- Faris, P.D., and Sainsbury, R.S. (1990). The role of the pontis oralis in the generation of RSA activity in the hippocampus of the guinea pig. *Physiology & behavior* 47, 1193-1199.
- Kitchigina, V.F., and Butuzova, M.V. (2009). Theta activity of septal neurons during different epileptic phases: the same frequency but different significance? *Experimental neurology* 216, 449-458.
- Lieberman, T., Velluti, R.A., and Pedemonte, M. (2009). Temporal correlation between auditory neurons and the hippocampal theta rhythm induced by novel stimulations in awake guinea pigs. *Brain research* 1298, 70-77.
- Pedemonte, M., Gambini, J.P., and Velluti, R.A. (2005). Novelty-induced correlation between visual neurons and the hippocampal theta rhythm in sleep and wakefulness. *Brain research* 1062, 9-15.
- Rivas, J., Gaztelu, J.M., and Garcia-Austt, E. (1996). Changes in hippocampal cell discharge patterns and theta rhythm spectral properties as a function of walking velocity in the guinea pig. *Experimental brain research. Experimentelle Hirnforschung. Experimentation cerebrale* 108, 113-118.
- Sainsbury, R.S. (1970). Hippocampal activity during natural behavior in the guinea pig. *Physiology & behavior* 5, 317-324.

## Rat

- Bland, B.H., Declerck, S., Jackson, J., Glasgow, S., and Oddie, S. (2007). Septohippocampal properties of N-methyl-D-aspartate-induced theta-band oscillation and synchrony. *Synapse* 61, 185-197.
- Bland, B.H., Oddie, S.D., and Colom, L.V. (1999). Mechanisms of neural synchrony in the septohippocampal pathways underlying hippocampal theta generation. *The Journal of neuroscience : the official journal of the Society for Neuroscience* 19, 3223-3237.

- Brankack, J., Stewart, M., and Fox, S.E. (1993). Current source density analysis of the hippocampal theta rhythm: associated sustained potentials and candidate synaptic generators. *Brain research* 615, 310-327.
- Buzsáki, G. (2005). Theta rhythm of navigation: link between path integration and landmark navigation, episodic and semantic memory. *Hippocampus* 15, 827-840.
- Buzsáki, G., Czopf, J., Kondakor, I., and Kellényi, L. (1986). Laminar distribution of hippocampal rhythmic slow activity (RSA) in the behaving rat: current-source density analysis, effects of urethane and atropine. *Brain research* 365, 125-137.
- Buzsáki, G., Grastyán, E., Kellényi, L., and Czopf, J. (1979). Dynamic phase-shifts between theta generators in the rat hippocampus. *Acta physiologica Academiae Scientiarum Hungaricae* 53, 41-45.
- Csicsvari, J., Hirase, H., Czurko, A., Mamiya, A., and Buzsáki, G. (1999). Oscillatory coupling of hippocampal pyramidal cells and interneurons in the behaving Rat. *The Journal of neuroscience : the official journal of the Society for Neuroscience* 19, 274-287.
- Fox, S.E., Wolfson, S., and Ranck, J.B., Jr. (1986). Hippocampal theta rhythm and the firing of neurons in walking and urethane anesthetized rats. *Experimental brain research. Experimentelle Hirnforschung. Experimentation cerebrale* 62, 495-508.
- Hangya, B., Borhegyi, Z., Szilágyi, N., Freund, T.F., and Varga, V. (2009). GABAergic neurons of the medial septum lead the hippocampal network during theta activity. *The Journal of neuroscience : the official journal of the Society for Neuroscience* 29, 8094-8102.
- Kamondi, A., Acsády, L., Wang, X.J., and Buzsáki, G. (1998). Theta oscillations in somata and dendrites of hippocampal pyramidal cells in vivo: activity-dependent phase-precession of action potentials. *Hippocampus* 8, 244-261.
- Kramis, R., Vanderwolf, C.H., and Bland, B.H. (1975). Two types of hippocampal rhythmical slow activity in both the rabbit and the rat: relations to behavior and effects of atropine, diethyl ether, urethane, and pentobarbital. *Experimental neurology* 49, 58-85.
- Leung, L.W., Lopes da Silva, F.H., and Wadman, W.J. (1982). Spectral characteristics of the hippocampal EEG in the freely moving rat. *Electroencephalography and clinical neurophysiology* 54, 203-219.
- Maurer, A.P., Vanrhoads, S.R., Sutherland, G.R., Lipa, P., and McNaughton, B.L. (2005). Self-motion and the origin of differential spatial scaling along the septo-temporal axis of the hippocampus. *Hippocampus* 15, 841-852.
- McFarland, W.L., Teitelbaum, H., and Hedges, E.K. (1975). Relationship between hippocampal theta activity and running speed in the rat. *Journal of comparative and physiological psychology* 88, 324-328.
- Mizuseki, K., Sirota, A., Pastalkova, E., and Buzsáki, G. (2009). Theta oscillations provide temporal windows for local circuit computation in the entorhinal-hippocampal loop. *Neuron* 64, 267-280.
- Patel, J., Fujisawa, S., Berenyi, A., Royer, S., and Buzsáki, G. (2012). Traveling theta waves along the entire septotemporal axis of the hippocampus. *Neuron* 75, 410-417.
- Pickenhain, L., and Klingberg, F. (1967). Hippocampal slow wave activity as a correlate of basic behavioral mechanisms in the rat. *Progress in brain research* 27, 218-227.
- Robinson, T.E. (1980). Hippocampal rhythmic slow activity (RSA; theta): a critical analysis of selected studies and discussion of possible species-differences. *Brain research* 203, 69-101.
- Royer, S., Sirota, A., Patel, J., and Buzsáki, G. (2010). Distinct representations and theta dynamics in dorsal and ventral hippocampus. *The Journal of neuroscience : the official journal of the Society for Neuroscience* 30, 1777-1787.
- Sainsbury, R.S., Heynen, A., and Montoya, C.P. (1987). Behavioral correlates of hippocampal type 2 theta in the rat. *Physiology & behavior* 39, 513-519.
- Scheffer-Teixeira, R., Belchior, H., Caixeta, F.V., Souza, B.C., Ribeiro, S., and Tort, A.B. (2012). Theta phase modulates multiple layer-specific oscillations in the CA1 region. *Cereb Cortex* 22, 2404-2414.
- Siapas, A.G., and Wilson, M.A. (1998). Coordinated interactions between hippocampal ripples and cortical spindles during slow-wave sleep. *Neuron* 21, 1123-1128.
- Sinnamon, H.M. (2005). Hippocampal theta activity and behavioral sequences in a reward-directed approach locomotor task. *Hippocampus* 15, 518-534.
- Soltész, I., and Deschenes, M. (1993). Low- and high-frequency membrane potential oscillations during theta activity in CA1 and CA3 pyramidal neurons of the rat hippocampus under ketamine-xylazine anesthesia. *Journal of neurophysiology* 70, 97-116.
- Vanderwolf, C.H. (1969). Hippocampal electrical activity and voluntary movement in the rat. *Electroencephalography and clinical neurophysiology* 26, 407-418.
- Vertes, R.P. (1982). Brain stem generation of the hippocampal EEG. *Progress in neurobiology* 19, 159-186.
- Vinogradova, O.S., and Brazhnik, E.S. (1979). Theta-volleys of neurons of the hippocampus and septum. *Neuroscience and behavioral physiology* 9, 373-378.
- Whishaw, I.Q., and Vanderwolf, C.H. (1973). Hippocampal EEG and behavior: changes in amplitude and frequency of RSA (theta rhythm) associated with spontaneous and learned movement patterns in rats and cats. *Behavioral biology* 8, 461-484.



Zhang, H., Lin, S.C., and Nicolelis, M.A. (2011). A distinctive subpopulation of medial septal slow-firing neurons promote hippocampal activation and theta oscillations. *Journal of neurophysiology* *106*, 2749-2763.

## Mouse

Adhikari, A., Topiwala, M.A., and Gordon, J.A. (2011). Single units in the medial prefrontal cortex with anxiety-related firing patterns are preferentially influenced by ventral hippocampal activity. *Neuron* *71*, 898-910.

Brankack, J., Scheffzuk, C., Kukushka, V.I., Vyssotski, A.L., Tort, A.B., and Draguhn, A. (2012). Distinct features of fast oscillations in phasic and tonic rapid eye movement sleep. *Journal of sleep research* *21*, 630-633.

Buschler, A., Goh, J.J., and Manahan-Vaughan, D. (2012). Frequency dependency of NMDA receptor-dependent synaptic plasticity in the hippocampal CA1 region of freely behaving mice. *Hippocampus* *22*, 2238-2248.

Caputi, A., Fuchs, E.C., Allen, K., Le Magueresse, C., and Monyer, H. (2012). Selective reduction of AMPA currents onto hippocampal interneurons impairs network oscillatory activity. *PLoS one* *7*, e37318.

Caudarella, M., Durkin, T., Galey, D., Jeantet, Y., and Jaffard, R. (1987). The effect of diazepam on hippocampal EEG in relation to behavior. *Brain research* *435*, 202-212.

Destrade, C. (1982). Two types of diencephalically driven RSA (theta) as a means of studying memory formation in mice. *Brain research* *234*, 486-493.

Dzirasa, K., Santos, L.M., Ribeiro, S., Stapleton, J., Gainetdinov, R.R., Caron, M.G., and Nicolelis, M.A. (2009). Persistent hyperdopaminergia decreases the peak frequency of hippocampal theta oscillations during quiet waking and REM sleep. *PLoS one* *4*, e5238.

Gollo, L.L., Mirasso, C.R., Atienza, M., Crespo-Garcia, M., and Cantero, J.L. (2011). Theta band zero-lag long-range cortical synchronization via hippocampal dynamical relaying. *PLoS one* *6*, e17756.

Harvey, C.D., Collman, F., Dombeck, D.A., and Tank, D.W. (2009). Intracellular dynamics of hippocampal place cells during virtual navigation. *Nature* *461*, 941-946.

Hentschke, H., Perkins, M.G., Pearce, R.A., and Banks, M.I. (2007). Muscarinic blockade weakens interaction of gamma with theta rhythms in mouse hippocampus. *The European journal of neuroscience* *26*, 1642-1656.

Ikonen, S., and Tanila, H. (2001). Effects of metrifonate on the hippocampal theta rhythm of freely moving intact and MS-lesioned mice. *Pharmacology, biochemistry, and behavior* *69*, 165-172.

Kiss, T., Feng, J., Hoffmann, W.E., Shaffer, C.L., and Hajos, M. (2013). Rhythmic theta and delta activity of cortical and hippocampal neuronal networks in genetically or pharmacologically induced N-methyl-D-aspartate receptor hypofunction under urethane anesthesia. *Neuroscience* *237*, 255-267.

Klemm, W.R. (1976). Physiological and behavioral significance of hippocampal rhythmic, slow activity ("theta rhythm"). *Progress in neurobiology* *6*, 23-47.

Kocsis, B., Bragin, A., and Buzsáki, G. (1999). Interdependence of multiple theta generators in the hippocampus: a partial coherence analysis. *The Journal of neuroscience : the official journal of the Society for Neuroscience* *19*, 6200-6212.

Korotkova, T., Fuchs, E.C., Ponomarenko, A., von Engelhardt, J., and Monyer, H. (2010). NMDA receptor ablation on parvalbumin-positive interneurons impairs hippocampal synchrony, spatial representations, and working memory. *Neuron* *68*, 557-569.

Lesting, J., Narayanan, R.T., Kluge, C., Sangha, S., Seidenbecher, T., and Pape, H.C. (2011). Patterns of coupled theta activity in amygdala-hippocampal-prefrontal cortical circuits during fear extinction. *PLoS one* *6*, e21714.

Maurer, A.P., Vanrhoads, S.R., Sutherland, G.R., Lipa, P., and McNaughton, B.L. (2005). Self-motion and the origin of differential spatial scaling along the septo-temporal axis of the hippocampus. *Hippocampus* *15*, 841-852.

Muller, R., Struck, H., Ho, M.S., Brockhaus-Dumke, A., Klosterkotter, J., Broich, K., Hescheler, J., Schneider, T., and Weiergraber, M. (2012). Atropine-sensitive hippocampal theta oscillations are mediated by Cav2.3 R-type Ca(2)(+) channels. *Neuroscience* *205*, 125-139.

Rawlins, J.N., Feldon, J., and Gray, J.A. (1979). Septo-hippocampal connections and the hippocampal theta rhythm. *Experimental brain research. Experimentelle Hirnforschung. Experimentation cerebrale* *37*, 49-63.

Royer, S., Zemelman, B.V., Losonczy, A., Kim, J., Chance, F., Magee, J.C., and Buzsáki, G. (2012). Control of timing, rate and bursts of hippocampal place cells by dendritic and somatic inhibition. *Nature neuroscience* *15*, 769-775.

Rubio, S.E., Vega-Flores, G., Martinez, A., Bosch, C., Perez-Mediavilla, A., del Rio, J., Gruart, A., Delgado-Garcia, J.M., Soriano, E., and Pascual, M. (2012). Accelerated aging of the GABAergic septohippocampal pathway and decreased hippocampal rhythms in a mouse model of Alzheimer's disease. *FASEB Journal* *26*, 4458-4467.

Shin, J. (2010). Passive rotation-induced theta rhythm and orientation homeostasis response. *Synapse* *64*, 409-415.

Sigurdsson, T., Stark, K.L., Karayiorgou, M., Gogos, J.A., and Gordon, J.A. (2010). Impaired hippocampal-prefrontal synchrony in a genetic mouse model of schizophrenia. *Nature* *464*, 763-767.

Varga, C., Golshani, P., and Soltesz, I. (2012). Frequency-invariant temporal ordering of interneuronal discharges during hippocampal oscillations in awake mice. *Proceedings of the National Academy of Sciences of the United States of America* *109*, E2726-2734.

Welsh, D.K., Richardson, G.S., and Dement, W.C. (1985). A circadian rhythm of hippocampal theta activity in the mouse. *Physiology & behavior* *35*, 533-538.

## Gamma

### Human

Canolty, R.T., Edwards, E., Dalal, S.S., Soltani, M., Nagarajan, S.S., Kirsch, H.E., Berger, M.S., Barbaro, N.M., and Knight, R.T. (2006). High gamma power is phase-locked to theta oscillations in human neocortex. *Science* *313*, 1626-1628.

Canolty, R.T., Ganguly, K., Kennerley, S.W., Cadieu, C.F., Koepsell, K., Wallis, J.D., and Carmena, J.M. (2010). Oscillatory phase coupling coordinates anatomically dispersed functional cell assemblies. *Proceedings of the National Academy of Sciences of the United States of America* *107*, 17356-17361.

Crone, N.E., Miglioretti, D.L., Gordon, B., and Lesser, R.P. (1998). Functional mapping of human sensorimotor cortex with electrocorticographic spectral analysis. II. Event-related synchronization in the gamma band. *Brain : a journal of neurology* *121 ( Pt 12)*, 2301-2315.

Crone, N.E., Sinai, A., and Korzeniewska, A. (2006). High-frequency gamma oscillations and human brain mapping with electrocorticography. *Progress in brain research* *159*, 275-295.

Demiralp, T., Bayraktaroglu, Z., Lenz, D., Junge, S., Busch, N.A., Maess, B., Ergen, M., and Herrmann, C.S. (2007). Gamma amplitudes are coupled to theta phase in human EEG during visual perception. *International journal of psychophysiology : official journal of the International Organization of Psychophysiology* *64*, 24-30.

Jensen, O., Kaiser, J., and Lachaux, J.P. (2007). Human gamma-frequency oscillations associated with attention and memory. *Trends in neurosciences* *30*, 317-324.

Joliot, M., Ribary, U., and Llinas, R. (1994). Human oscillatory brain activity near 40 Hz coexists with cognitive temporal binding. *Proceedings of the National Academy of Sciences of the United States of America* *91*, 11748-11751.

Lachaux, J.P., Rodriguez, E., Martinerie, J., and Varela, F.J. (1999). Measuring phase synchrony in brain signals. *Human brain mapping* *8*, 194-208.

Le Van Quyen, M., Staba, R., Bragin, A., Dickson, C., Valderrama, M., Fried, I., and Engel, J. (2010). Large-scale microelectrode recordings of high-frequency gamma oscillations in human cortex during sleep. *The Journal of neuroscience : the official journal of the Society for Neuroscience* *30*, 7770-7782.

Llinas, R., and Ribary, U. (1993). Coherent 40-Hz oscillation characterizes dream state in humans. *Proceedings of the National Academy of Sciences of the United States of America* *90*, 2078-2081.

Rodriguez, E., George, N., Lachaux, J.P., Martinerie, J., Renault, B., and Varela, F.J. (1999). Perception's shadow: long-distance synchronization of human brain activity. *Nature* *397*, 430-433.

Sederberg, P.B., Schulze-Bonhage, A., Madsen, J.R., Bromfield, E.B., McCarthy, D.C., Brandt, A., Tully, M.S., and Kahana, M.J. (2007). Hippocampal and neocortical gamma oscillations predict memory formation in humans. *Cereb Cortex* *17*, 1190-1196.

Tallon-Baudry, C., Bertrand, O., Delpuech, C., and Pernier, J. (1996). Stimulus specificity of phase-locked and non-phase-locked 40 Hz visual responses in human. *The Journal of neuroscience : the official journal of the Society for Neuroscience* *16*, 4240-4249.

Tallon-Baudry, C., Bertrand, O., Peronnet, F., and Pernier, J. (1998). Induced gamma-band activity during the delay of a visual short-term memory task in humans. *The Journal of neuroscience : the official journal of the Society for Neuroscience* *18*, 4244-4254.

### Monkey

Brosch, M., Budinger, E., and Scheich, H. (2002). Stimulus-related gamma oscillations in primate auditory cortex. *Journal of neurophysiology* *87*, 2715-2725.

Buffalo, E.A., Fries, P., Landman, R., Buschman, T.J., and Desimone, R. (2011). Laminar differences in gamma and alpha coherence in the ventral stream. *Proceedings of the National Academy of Sciences of the United States of America* *108*, 11262-11267.

Friedman-Hill, S., Maldonado, P.E., and Gray, C.M. (2000). Dynamics of striate cortical activity in the alert macaque: I. Incidence and stimulus-dependence of gamma-band neuronal oscillations. *Cereb Cortex* *10*, 1105-1116.

Fries, P., Reynolds, J.H., Rorie, A.E., and Desimone, R. (2001). Modulation of oscillatory neuronal synchronization by selective visual attention. *Science* *291*, 1560-1563.

Kreiter, A.K., and Singer, W. (1992). Oscillatory Neuronal Responses in the Visual Cortex of the Awake Macaque Monkey. *The European journal of neuroscience* *4*, 369-375.

Leopold, D.A., Murayama, Y., and Logothetis, N.K. (2003). Very slow activity fluctuations in monkey visual cortex: implications for functional brain imaging. *Cereb Cortex* *13*, 422-433.

Lima, B., Singer, W., Chen, N.H., and Neuenschwander, S. (2010). Synchronization dynamics in response to plaid stimuli in monkey V1. *Cereb Cortex* *20*, 1556-1573.

Lima, B., Singer, W., and Neuenschwander, S. (2011). Gamma responses correlate with temporal expectation in monkey primary visual cortex. *The Journal of neuroscience : the official journal of the Society for Neuroscience* *31*, 15919-15931.

Ray, S., and Maunsell, J.H. (2011). Different origins of gamma rhythm and high-gamma activity in macaque visual cortex. *PLoS biology* 9, e1000610.

Vinck, M., Lima, B., Womelsdorf, T., Oostenveld, R., Singer, W., Neuenschwander, S., and Fries, P. (2010). Gamma-phase shifting in awake monkey visual cortex. *The Journal of neuroscience : the official journal of the Society for Neuroscience* 30, 1250-1257.

## Cat

Bressler, S.L., and Freeman, W.J. (1980). Frequency analysis of olfactory system EEG in cat, rabbit, and rat. *Electroencephalography and clinical neurophysiology* 50, 19-24.

Eckhorn, R., Bauer, R., Jordan, W., Brosch, M., Kruse, W., Munk, M., and Reitboeck, H.J. (1988). Coherent oscillations: a mechanism of feature linking in the visual cortex? Multiple electrode and correlation analyses in the cat. *Biological cybernetics* 60, 121-130.

Fries, P., Nikolic, D., and Singer, W. (2007). The gamma cycle. *Trends in neurosciences* 30, 309-316.

Gray, C.M., Engel, A.K., Konig, P., and Singer, W. (1990). Stimulus-Dependent Neuronal Oscillations in Cat Visual Cortex: Receptive Field Properties and Feature Dependence. *The European journal of neuroscience* 2, 607-619.

Gray, C.M., Konig, P., Engel, A.K., and Singer, W. (1989). Oscillatory responses in cat visual cortex exhibit inter-columnar synchronization which reflects global stimulus properties. *Nature* 338, 334-337.

Gray, C.M., and Singer, W. (1989). Stimulus-specific neuronal oscillations in orientation columns of cat visual cortex. *Proceedings of the National Academy of Sciences of the United States of America* 86, 1698-1702.

Kruse, W., and Eckhorn, R. (1996). Inhibition of sustained gamma oscillations (35-80 Hz) by fast transient responses in cat visual cortex. *Proceedings of the National Academy of Sciences of the United States of America* 93, 6112-6117.

Nikolic, D., Fries, P., and Singer, W. (2013). Gamma oscillations: precise temporal coordination without a metronome. *Trends in cognitive sciences* 17, 54-55.

Popescu, A.T., Popa, D., and Pare, D. (2009). Coherent gamma oscillations couple the amygdala and striatum during learning. *Nature neuroscience* 12, 801-807.

Roelfsema, P.R., Engel, A.K., Konig, P., and Singer, W. (1997). Visuomotor integration is associated with zero time-lag synchronization among cortical areas. *Nature* 385, 157-161.

Steriade, M., Amzica, F., and Contreras, D. (1996). Synchronization of fast (30-40 Hz) spontaneous cortical rhythms during brain activation. *The Journal of neuroscience : the official journal of the Society for Neuroscience* 16, 392-417.

## Sheep

Ge, T., Kendrick, K.M., and Feng, J. (2009). A novel extended Granger Causal Model approach demonstrates brain hemispheric differences during face recognition learning. *PLoS computational biology* 5, e1000570.

Kendrick, K.M., Zhan, Y., Fischer, H., Nicol, A.U., Zhang, X., and Feng, J. (2011). Learning alters theta amplitude, theta-gamma coupling and neuronal synchronization in inferotemporal cortex. *BMC neuroscience* 12, 55.

## Rabbit

Freeman, W.J. (1978). Spatial properties of an EEG event in the olfactory bulb and cortex. *Electroencephalography and clinical neurophysiology* 44, 586-605.

Freeman, W.J., and Barrie, J.M. (2000). Analysis of spatial patterns of phase in neocortical gamma EEGs in rabbit. *Journal of neurophysiology* 84, 1266-1278.

Stumpf, C. (1965). The Fast Component in the Electrical Activity of Rabbit's Hippocampus. *Electroencephalography and clinical neurophysiology* 18, 477-486.

## Rat

Belluscio, M.A., Mizuseki, K., Schmidt, R., Kempter, R., and Buzsáki, G. (2012). Cross-frequency phase-phase coupling between theta and gamma oscillations in the hippocampus. *The Journal of neuroscience : the official journal of the Society for Neuroscience* 32, 423-435.

Bragin, A., Jando, G., Nadasdy, Z., Hetke, J., Wise, K., and Buzsáki, G. (1995). Gamma (40-100 Hz) oscillation in the hippocampus of the behaving rat. *The Journal of neuroscience : the official journal of the Society for Neuroscience* 15, 47-60.

Buzsáki, G., Leung, L.W., and Vanderwolf, C.H. (1983). Cellular bases of hippocampal EEG in the behaving rat. *Brain research* 287, 139-171.

Chrobak, J.J., and Buzsáki, G. (1998). Gamma oscillations in the entorhinal cortex of the freely behaving rat. *The Journal of neuroscience : the official journal of the Society for Neuroscience* 18, 388-398.

Colgin, L.L., Denninger, T., Fyhn, M., Hafting, T., Bonnevie, T., Jensen, O., Moser, M.B., and Moser, E.I. (2009). Frequency of gamma oscillations routes flow of information in the hippocampus. *Nature* 462, 353-357.

Csicsvari, J., Jamieson, B., Wise, K.D., and Buzsáki, G. (2003). Mechanisms of gamma oscillations in the hippocampus of the behaving rat. *Neuron* 37, 311-322.

Montgomery, S.M., and Buzsáki, G. (2007). Gamma oscillations dynamically couple hippocampal CA3 and CA1 regions during memory task performance. *Proceedings of the National Academy of Sciences of the United States of America* *104*, 14495-14500.

Penttonen, M., Kamondi, A., Acsády, L., and Buzsáki, G. (1998). Gamma frequency oscillation in the hippocampus of the rat: intracellular analysis in vivo. *The European journal of neuroscience* *10*, 718-728.

Senior, T.J., Huxter, J.R., Allen, K., O'Neill, J., and Csicsvari, J. (2008). Gamma oscillatory firing reveals distinct populations of pyramidal cells in the CA1 region of the hippocampus. *The Journal of neuroscience : the official journal of the Society for Neuroscience* *28*, 2274-2286.

Sirota, A., Montgomery, S., Fujisawa, S., Isomura, Y., Zugaro, M., and Buzsáki, G. (2008). Entrainment of neocortical neurons and gamma oscillations by the hippocampal theta rhythm. *Neuron* *60*, 683-697.

Tort, A.B., Komorowski, R.W., Manns, J.R., Kopell, N.J., and Eichenbaum, H. (2009). Theta-gamma coupling increases during the learning of item-context associations. *Proceedings of the National Academy of Sciences of the United States of America* *106*, 20942-20947.

## Mouse

Buhl, D.L., Harris, K.D., Hormuzdi, S.G., Monyer, H., and Buzsáki, G. (2003). Selective impairment of hippocampal gamma oscillations in connexin-36 knock-out mouse in vivo. *The Journal of neuroscience : the official journal of the Society for Neuroscience* *23*, 1013-1018.

Cardin, J.A., Carlen, M., Meletis, K., Knoblich, U., Zhang, F., Deisseroth, K., Tsai, L.H., and Moore, C.I. (2009). Driving fast-spiking cells induces gamma rhythm and controls sensory responses. *Nature* *459*, 663-667.

Chen, Z., Resnik, E., McFarland, J.M., Sakmann, B., and Mehta, M.R. (2011). Speed controls the amplitude and timing of the hippocampal gamma rhythm. *PLoS one* *6*, e21408.

Hentschke, H., Perkins, M.G., Pearce, R.A., and Banks, M.I. (2007). Muscarinic blockade weakens interaction of gamma with theta rhythms in mouse hippocampus. *The European journal of neuroscience* *26*, 1642-1656.

Sohal, V.S., Zhang, F., Yizhar, O., and Deisseroth, K. (2009). Parvalbumin neurons and gamma rhythms enhance cortical circuit performance. *Nature* *459*, 698-702.

## Ripples

### Human

Bragin, A., Engel, J., Jr., Wilson, C.L., Fried, I., and Buzsáki, G. (1999). High-frequency oscillations in human brain. *Hippocampus* *9*, 137-142.

Clemens, Z., Mölle, M., Eross, L., Barsi, P., Halász, P., and Born, J. (2007). Temporal coupling of parahippocampal ripples, sleep spindles and slow oscillations in humans. *Brain : a journal of neurology* *130*, 2868-2878.

Le Van Quyen, M., Staba, R., Bragin, A., Dickson, C., Valderrama, M., Fried, I., and Engel, J. (2010). Large-scale microelectrode recordings of high-frequency gamma oscillations in human cortex during sleep. *The Journal of neuroscience : the official journal of the Society for Neuroscience* *30*, 7770-7782.

### Monkey

Logothetis, N.K., Eschenko, O., Murayama, Y., Augath, M., Steudel, T., Evrard, H.C., Besserve, M., and Oeltermann, A. (2012). Hippocampal-cortical interaction during periods of subcortical silence. *Nature* *491*, 547-553.

Skaggs, W.E., McNaughton, B.L., Permenter, M., Archibeque, M., Vogt, J., Amaral, D.G., and Barnes, C.A. (2007). EEG sharp waves and sparse ensemble unit activity in the macaque hippocampus. *Journal of neurophysiology* *98*, 898-910.

### Cat

Kanamori, N. (1985). A spindle-like wave in the cat hippocampus: a novel vigilance level-dependent electrical activity. *Brain research* *334*, 180-182.

### Rabbit

Nokia, M.S., Penttonen, M., and Wikgren, J. (2010). Hippocampal ripple-contingent training accelerates trace eyeblink conditioning and retards extinction in rabbits. *The Journal of neuroscience : the official journal of the Society for Neuroscience* *30*, 11486-11492.

### Rat

Battaglia, F.P., Sutherland, G.R., and McNaughton, B.L. (2004). Hippocampal sharp wave bursts coincide with neocortical "up-state" transitions. *Learn Mem* *11*, 697-704.

Buzsáki, G., Horvath, Z., Urioste, R., Hetke, J., and Wise, K. (1992). High-frequency network oscillation in the hippocampus. *Science* *256*, 1025-1027.

Csicsvari, J., Hirase, H., Mamiya, A., and Buzsáki, G. (2000). Ensemble patterns of hippocampal CA3-CA1 neurons during sharp wave-associated population events. *Neuron* *28*, 585-594.

Eschenko, O., Ramadan, W., Mölle, M., Born, J., and Sara, S.J. (2008). Sustained increase in hippocampal sharp-wave ripple activity during slow-wave sleep after learning. *Learn Mem* *15*, 222-228.

Girardeau, G., Benchenane, K., Wiener, S.I., Buzsáki, G., and Zugaro, M.B. (2009). Selective suppression of hippocampal ripples impairs spatial memory. *Nature neuroscience* *12*, 1222-1223.

Jones, M.S., and Barth, D.S. (1999). Spatiotemporal organization of fast (>200 Hz) electrical oscillations in rat Vibrissa/Barrel cortex. *Journal of neurophysiology* *82*, 1599-1609.

Kandel, A., and Buzsáki, G. (1997). Cellular-synaptic generation of sleep spindles, spike-and-wave discharges, and evoked thalamocortical responses in the neocortex of the rat. *The Journal of neuroscience : the official journal of the Society for Neuroscience* *17*, 6783-6797.

Karlsson, M.P., and Frank, L.M. (2008). Network dynamics underlying the formation of sparse, informative representations in the hippocampus. *The Journal of neuroscience : the official journal of the Society for Neuroscience* *28*, 14271-14281.

Kudrimoti, H.S., Barnes, C.A., and McNaughton, B.L. (1999). Reactivation of hippocampal cell assemblies: effects of behavioral state, experience, and EEG dynamics. *The Journal of neuroscience : the official journal of the Society for Neuroscience* *19*, 4090-4101.

Lee, A.K., and Wilson, M.A. (2002). Memory of sequential experience in the hippocampus during slow wave sleep. *Neuron* *36*, 1183-1194.

Leinekugel, X., Khazipov, R., Cannon, R., Hirase, H., Ben-Ari, Y., and Buzsáki, G. (2002). Correlated bursts of activity in the neonatal hippocampus in vivo. *Science* *296*, 2049-2052.

Mölle, M., Yeshenko, O., Marshall, L., Sara, S.J., and Born, J. (2006). Hippocampal sharp wave-ripples linked to slow oscillations in rat slow-wave sleep. *Journal of neurophysiology* *96*, 62-70.

Nakashiba, T., Buhl, D.L., McHugh, T.J., and Tonegawa, S. (2009). Hippocampal CA3 output is crucial for ripple-associated reactivation and consolidation of memory. *Neuron* *62*, 781-787.

O'Neill, J., Senior, T.J., Allen, K., Huxter, J.R., and Csicsvari, J. (2008). Reactivation of experience-dependent cell assembly patterns in the hippocampus. *Nature neuroscience* *11*, 209-215.

Peyrache, A., Khamassi, M., Benchenane, K., Wiener, S.I., and Battaglia, F.P. (2009). Replay of rule-learning related neural patterns in the prefrontal cortex during sleep. *Nature neuroscience* *12*, 919-926.

Siapas, A.G., and Wilson, M.A. (1998). Coordinated interactions between hippocampal ripples and cortical spindles during slow-wave sleep. *Neuron* *21*, 1123-1128.

Sirota, A., Csicsvari, J., Buhl, D., and Buzsáki, G. (2003). Communication between neocortex and hippocampus during sleep in rodents. *Proceedings of the National Academy of Sciences of the United States of America* *100*, 2065-2069.

Sullivan, D., Csicsvari, J., Mizuseki, K., Montgomery, S., Diba, K., and Buzsáki, G. (2011). Relationships between hippocampal sharp waves, ripples, and fast gamma oscillation: influence of dentate and entorhinal cortical activity. *The Journal of neuroscience : the official journal of the Society for Neuroscience* *31*, 8605-8616.

Ylinen, A., Bragin, A., Nadasy, Z., Jando, G., Szabo, I., Sik, A., and Buzsáki, G. (1995). Sharp wave-associated high-frequency oscillation (200 Hz) in the intact hippocampus: network and intracellular mechanisms. *The Journal of neuroscience : the official journal of the Society for Neuroscience* *15*, 30-46.

## Mouse

Buzsáki, G., Buhl, D.L., Harris, K.D., Csicsvari, J., Czéh, B., and Morozov, A. (2003). Hippocampal network patterns of activity in the mouse. *Neuroscience* *116*, 201-211.

Racz, A., Ponomarenko, A.A., Fuchs, E.C., and Monyer, H. (2009). Augmented hippocampal ripple oscillations in mice with reduced fast excitation onto parvalbumin-positive cells. *The Journal of neuroscience : the official journal of the Society for Neuroscience* *29*, 2563-2568.

Royer, S., Zemelman, B.V., Losonczy, A., Kim, J., Chance, F., Magee, J.C., and Buzsáki, G. (2012). Control of timing, rate and bursts of hippocampal place cells by dendritic and somatic inhibition. *Nature neuroscience* *15*, 769-775.

## Beta

### Human

Engel, A.K., and Fries, P. (2010). Beta-band oscillations--signalling the status quo? *Current opinion in neurobiology* *20*, 156-165.

Hirai, N., Uchida, S., Maehara, T., Okubo, Y., and Shimizu, H. (1999). Beta-1 (10-20 Hz) cortical oscillations observed in the human medial temporal lobe. *Neuroreport* *10*, 3055-3059.

Hong, L.E., Buchanan, R.W., Thaker, G.K., Shepard, P.D., and Summerfelt, A. (2008). Beta (~16 Hz) frequency neural oscillations mediate auditory sensory gating in humans. *Psychophysiology* *45*, 197-204.

Maki, H., and Ilmoniemi, R.J. (2010). EEG oscillations and magnetically evoked motor potentials reflect motor system excitability in overlapping neuronal populations. *Clinical neurophysiology : official journal of the International Federation of Clinical Neurophysiology* *121*, 492-501.

Mima, T., Steger, J., Schulman, A.E., Gerloff, C., and Hallett, M. (2000). Electroencephalographic measurement of motor cortex control of muscle activity in humans. *Clinical neurophysiology : official journal of the International Federation of Clinical Neurophysiology* *111*, 326-337.

Pfurtscheller, G., Daly, I., Bauernfeind, G., and Muller-Putz, G.R. (2012). Coupling between intrinsic prefrontal HbO2 and central EEG beta power oscillations in the resting brain. *PloS one* *7*, e43640.

Spitzer, B., Wacker, E., and Blankenburg, F. (2010). Oscillatory correlates of vibrotactile frequency processing in human working memory. *The Journal of neuroscience : the official journal of the Society for Neuroscience* 30, 4496-4502.

## Monkey

Baker, S.N., Olivier, E., and Lemon, R.N. (1997). Coherent oscillations in monkey motor cortex and hand muscle EMG show task-dependent modulation. *The Journal of physiology* 501 ( Pt 1), 225-241.

Brovelli, A., Ding, M., Ledberg, A., Chen, Y., Nakamura, R., and Bressler, S.L. (2004). Beta oscillations in a large-scale sensorimotor cortical network: directional influences revealed by Granger causality. *Proceedings of the National Academy of Sciences of the United States of America* 101, 9849-9854.

Haegens, S., Nacher, V., Hernandez, A., Luna, R., Jensen, O., and Romo, R. (2011). Beta oscillations in the monkey sensorimotor network reflect somatosensory decision making. *Proceedings of the National Academy of Sciences of the United States of America* 108, 10708-10713.

Murthy, V.N., and Fetz, E.E. (1992). Coherent 25- to 35-Hz oscillations in the sensorimotor cortex of awake behaving monkeys. *Proceedings of the National Academy of Sciences of the United States of America* 89, 5670-5674.

Reimer, J., and Hatsopoulos, N.G. (2010). Periodicity and evoked responses in motor cortex. *The Journal of neuroscience : the official journal of the Society for Neuroscience* 30, 11506-11515.

Witham, C.L., Wang, M., and Baker, S.N. (2007). Cells in somatosensory areas show synchrony with beta oscillations in monkey motor cortex. *The European journal of neuroscience* 26, 2677-2686.

Zhang, Y., Chen, Y., Bressler, S.L., and Ding, M. (2008). Response preparation and inhibition: the role of the cortical sensorimotor beta rhythm. *Neuroscience* 156, 238-246.

## Cat

Bouyer, J.J., Tilquin, C., and Rougeul, A. (1983). Thalamic rhythms in cat during quiet wakefulness and immobility. *Electroencephalography and clinical neurophysiology* 55, 180-187.

Sterman, M.B., Wyrwicka, W., and Howe, R. (1969). Behavioral and neurophysiological studies of the sensorimotor rhythm in the cat. *Electroencephalography and clinical neurophysiology* 27, 678-679.

## Rat

Chapman, C.A., Xu, Y., Haykin, S., and Racine, R.J. (1998). Beta-frequency (15-35 Hz) electroencephalogram activities elicited by toluene and electrical stimulation in the behaving rat. *Neuroscience* 86, 1307-1319.

Kay, L.M., and Beshel, J. (2010). A beta oscillation network in the rat olfactory system during a 2-alternative choice odor discrimination task. *Journal of neurophysiology* 104, 829-839.

Leventhal, D.K., Gage, G.J., Schmidt, R., Pettibone, J.R., Case, A.C., and Berke, J.D. (2012). Basal ganglia beta oscillations accompany cue utilization. *Neuron* 73, 523-536.

Quinn, L.K., Nitz, D.A., and Chiba, A.A. (2010). Learning-dependent dynamics of beta-frequency oscillations in the basal forebrain of rats. *The European journal of neuroscience* 32, 1507-1515.

Vanderwolf, C.H., and Zibrowski, E.M. (2001). Pyriform cortex beta-waves: odor-specific sensitization following repeated olfactory stimulation. *Brain research* 892, 301-308.

## Slow oscillations (~1 Hz)

### Human

Achermann, P., and Borbely, A.A. (1997). Low-frequency (< 1 Hz) oscillations in the human sleep electroencephalogram. *Neuroscience* 81, 213-222.

Amzica, F., and Steriade, M. (2002). The functional significance of K-complexes. *Sleep medicine reviews* 6, 139-149.

Cash, S.S., Halgren, E., Dehghani, N., Rossetti, A.O., Thesen, T., Wang, C., Devinsky, O., Kuzniecky, R., Doyle, W., Madsen, J.R., *et al.* (2009). The human K-complex represents an isolated cortical down-state. *Science* 324, 1084-1087.

Clemens, Z., Mölle, M., Eross, L., Barsi, P., Halász, P., and Born, J. (2007). Temporal coupling of parahippocampal ripples, sleep spindles and slow oscillations in humans. *Brain : a journal of neurology* 130, 2868-2878.

Csercsa, R., Dombovari, B., Fabo, D., Wittner, L., Eross, L., Entz, L., Solyom, A., Rasonyi, G., Szucs, A., Kelemen, A., *et al.* (2010). Laminar analysis of slow wave activity in humans. *Brain : a journal of neurology* 133, 2814-2829.

Fell, J., Elfadil, H., Roschke, J., Burr, W., Klaver, P., Elger, C.E., and Fernandez, G. (2002). Human scalp recorded sigma activity is modulated by slow EEG oscillations during deep sleep. *The International journal of neuroscience* 112, 893-900.

Lewis, L.D., Weiner, V.S., Mukamel, E.A., Donoghue, J.A., Eskandar, E.N., Madsen, J.R., Anderson, W.S., Hochberg, L.R., Cash, S.S., Brown, E.N., and Purdon, P.L. (2012). Rapid fragmentation of neuronal networks at the onset of propofol-induced unconsciousness. *Proceedings of the National Academy of Sciences of the United States of America* *109*, E3377-3386.

Massimini, M., Huber, R., Ferrarelli, F., Hill, S., and Tononi, G. (2004). The sleep slow oscillation as a traveling wave. *The Journal of neuroscience : the official journal of the Society for Neuroscience* *24*, 6862-6870.

Massimini, M., Rosanova, M., and Mariotti, M. (2003). EEG slow (approximately 1 Hz) waves are associated with nonstationarity of thalamo-cortical sensory processing in the sleeping human. *Journal of neurophysiology* *89*, 1205-1213.

Möller, M., and Born, J. (2011). Slow oscillations orchestrating fast oscillations and memory consolidation. *Progress in brain research* *193*, 93-110.

Ngo, H.V., Martinetz, T., Born, J., and Möller, M. (2013). Auditory closed-loop stimulation of the sleep slow oscillation enhances memory. *Neuron* *78*, 545-553.

Nir, Y., Staba, R.J., Andrillon, T., Vyazovskiy, V.V., Cirelli, C., Fried, I., and Tononi, G. (2011). Regional slow waves and spindles in human sleep. *Neuron* *70*, 153-169.

Steriade, M. (2004). Acetylcholine systems and rhythmic activities during the waking--sleep cycle. *Progress in brain research* *145*, 179-196.

Steriade, M. (2006). Grouping of brain rhythms in corticothalamic systems. *Neuroscience* *137*, 1087-1106.

## Chimpanzee

Adey, W.R., Kado, R.T., and Rhodes, J.M. (1963). Sleep: Cortical and Subcortical Recordings in the Chimpanzee. *Science* *141*, 932-933.

## Monkey

Lakatos, P., Shah, A.S., Knuth, K.H., Ulbert, I., Karmos, G., and Schroeder, C.E. (2005). An oscillatory hierarchy controlling neuronal excitability and stimulus processing in the auditory cortex. *Journal of neurophysiology* *94*, 1904-1911.

Schroeder, C.E., and Lakatos, P. (2009). Low-frequency neuronal oscillations as instruments of sensory selection. *Trends in neurosciences* *32*, 9-18.

## Cat

Amzica, F., Nunez, A., and Steriade, M. (1992). Delta frequency (1-4 Hz) oscillations of perigeniculate thalamic neurons and their modulation by light. *Neuroscience* *51*, 285-294.

Steriade, M., Contreras, D., Curro Dossi, R., and Nunez, A. (1993a). The slow (< 1 Hz) oscillation in reticular thalamic and thalamocortical neurons: scenario of sleep rhythm generation in interacting thalamic and neocortical networks. *The Journal of neuroscience : the official journal of the Society for Neuroscience* *13*, 3284-3299.

Steriade, M., Nunez, A., and Amzica, F. (1993b). Intracellular analysis of relations between the slow (< 1 Hz) neocortical oscillation and other sleep rhythms of the electroencephalogram. *The Journal of neuroscience : the official journal of the Society for Neuroscience* *13*, 3266-3283.

Steriade, M., Nunez, A., and Amzica, F. (1993c). A novel slow (< 1 Hz) oscillation of neocortical neurons in vivo: depolarizing and hyperpolarizing components. *The Journal of neuroscience : the official journal of the Society for Neuroscience* *13*, 3252-3265.

## Rabbit

Rappelsberger, P., Pockberger, H., and Petsche, H. (1982). The contribution of the cortical layers to the generation of the EEG: field potential and current source density analyses in the rabbit's visual cortex. *Electroencephalography and clinical neurophysiology* *53*, 254-269.

## Rat

Battaglia, F.P., Sutherland, G.R., and McNaughton, B.L. (2004). Hippocampal sharp wave bursts coincide with neocortical "up-state" transitions. *Learn Mem* *11*, 697-704.

Binder, S., Baier, P.C., Möller, M., Inostroza, M., Born, J., and Marshall, L. (2012). Sleep enhances memory consolidation in the hippocampus-dependent object-place recognition task in rats. *Neurobiology of learning and memory* *97*, 213-219.

Buzsáki, G., Bickford, R.G., Ponomareff, G., Thal, L.J., Mandel, R., and Gage, F.H. (1988). Nucleus basalis and thalamic control of neocortical activity in the freely moving rat. *The Journal of neuroscience : the official journal of the Society for Neuroscience* *8*, 4007-4026.

Hahn, T.T., Sakmann, B., and Mehta, M.R. (2007). Differential responses of hippocampal subfields to cortical up-down states. *Proceedings of the National Academy of Sciences of the United States of America* *104*, 5169-5174.

Isomura, Y., Sirota, A., Ozen, S., Montgomery, S., Mizuseki, K., Henze, D.A., and Buzsáki, G. (2006). Integration and segregation of activity in entorhinal-hippocampal subregions by neocortical slow oscillations. *Neuron* *52*, 871-882.

Johnson, L.A., Euston, D.R., Tatsuno, M., and McNaughton, B.L. (2010). Stored-trace reactivation in rat prefrontal cortex is correlated with down-to-up state fluctuation density. *The Journal of neuroscience : the official journal of the Society for Neuroscience* *30*, 2650-2661.

Leung, L.S., and Yim, C.Y. (1993). Rhythmic delta-frequency activities in the nucleus accumbens of anesthetized and freely moving rats. *Canadian journal of physiology and pharmacology* *71*, 311-320.

Luczak, A., Bartho, P., Marguet, S.L., Buzsáki, G., and Harris, K.D. (2007). Sequential structure of neocortical spontaneous activity in vivo. *Proceedings of the National Academy of Sciences of the United States of America* 104, 347-352.

Mölle, M., Eschenko, O., Gais, S., Sara, S.J., and Born, J. (2009). The influence of learning on sleep slow oscillations and associated spindles and ripples in humans and rats. *The European journal of neuroscience* 29, 1071-1081.

Mölle, M., Yeshenko, O., Marshall, L., Sara, S.J., and Born, J. (2006). Hippocampal sharp wave-ripples linked to slow oscillations in rat slow-wave sleep. *Journal of neurophysiology* 96, 62-70.

Sakata, S., and Harris, K.D. (2012). Laminar-dependent effects of cortical state on auditory cortical spontaneous activity. *Frontiers in neural circuits* 6, 109.

Schall, K.P., Kerber, J., and Dickson, C.T. (2008). Rhythmic constraints on hippocampal processing: state and phase-related fluctuations of synaptic excitability during theta and the slow oscillation. *Journal of neurophysiology* 99, 888-899.

Slezia, A., Hangya, B., Ulbert, I., and Acsády, L. (2011). Phase advancement and nucleus-specific timing of thalamocortical activity during slow cortical oscillation. *The Journal of neuroscience : the official journal of the Society for Neuroscience* 31, 607-617.

Taxidis, J., Mizuseki, K., Mason, R., and Owen, M.R. (2013). Influence of slow oscillation on hippocampal activity and ripples through cortico-hippocampal synaptic interactions, analyzed by a cortical-CA3-CA1 network model. *Frontiers in computational neuroscience* 7, 3.

Wolansky, T., Clement, E.A., Peters, S.R., Palczak, M.A., and Dickson, C.T. (2006). Hippocampal slow oscillation: a novel EEG state and its coordination with ongoing neocortical activity. *The Journal of neuroscience : the official journal of the Society for Neuroscience* 26, 6213-6229.

## Mouse

Ferezou, I., Haiss, F., Gentet, L.J., Aronoff, R., Weber, B., and Petersen, C.C. (2007). Spatiotemporal dynamics of cortical sensorimotor integration in behaving mice. *Neuron* 56, 907-923.

Wisor, J.P., Rempe, M.J., Schmidt, M.A., Moore, M.E., and Clegern, W.C. (2013). Sleep slow-wave activity regulates cerebral glycolytic metabolism. *Cereb Cortex* 23, 1978-1987.

## Ultra slow oscillations (<0.1 Hz)

### Human

Achermann, P., and Borbely, A.A. (1997). Low-frequency (< 1 Hz) oscillations in the human sleep electroencephalogram. *Neuroscience* 81, 213-222.

Fox, M.D., and Raichle, M.E. (2007). Spontaneous fluctuations in brain activity observed with functional magnetic resonance imaging. *Nature reviews. Neuroscience* 8, 700-711.

He, B.J., Snyder, A.Z., Zempel, J.M., Smyth, M.D., and Raichle, M.E. (2008). Electrophysiological correlates of the brain's intrinsic large-scale functional architecture. *Proceedings of the National Academy of Sciences of the United States of America* 105, 16039-16044.

Moiseeva, N.I., and Aleksanian, Z.A. (1986). Slow-wave oscillations of the multi-unit activity average frequency in the human brain during drowsiness and sleep. *Electroencephalography and clinical neurophysiology* 63, 431-437.

Monto, S., Palva, S., Voipio, J., and Palva, J.M. (2008). Very slow EEG fluctuations predict the dynamics of stimulus detection and oscillation amplitudes in humans. *The Journal of neuroscience : the official journal of the Society for Neuroscience* 28, 8268-8272.

Novak, P., Lepicovska, V., and Dostalek, C. (1992). Periodic amplitude modulation of EEG. *Neuroscience letters* 136, 213-215.

Vanhatalo, S., Palva, J.M., Holmes, M.D., Miller, J.W., Voipio, J., and Kaila, K. (2004). Infralow oscillations modulate excitability and interictal epileptic activity in the human cortex during sleep. *Proceedings of the National Academy of Sciences of the United States of America* 101, 5053-5057.

### Monkey

Leopold, D.A., Murayama, Y., and Logothetis, N.K. (2003). Very slow activity fluctuations in monkey visual cortex: implications for functional brain imaging. *Cereb Cortex* 13, 422-433.

### Cat

Hughes, S.W., Lorincz, M.L., Parri, H.R., and Crunelli, V. (2011). Infralow (<0.1 Hz) oscillations in thalamic relay nuclei basic mechanisms and significance to health and disease states. *Progress in brain research* 193, 145-162.

Norton, S., and Jewett, R.E. (1965). Frequencies of slow potential oscillations in the cortex of cats. *Electroencephalography and clinical neurophysiology* 19, 377-386.

### Rabbit

Aladjalova, N.A. (1957). Infra-slow rhythmic oscillations of the steady potential of the cerebral cortex. *Nature* 179, 957-959.

### Rat

Albrecht, D., and Gabriel, S. (1994). Very slow oscillations of activity in geniculate neurones of urethane-anaesthetized rats. *Neuroreport* 5, 1909-1912.



Filippov, I.V., and Frolov, V.A. (2005). Very slow potentials in the lateral geniculate complex and primary visual cortex during different illumination changes in freely moving rats. *Neuroscience letters* 373, 51-56.

Jando, G., Carpi, D., Kandel, A., Urioste, R., Horvath, Z., Pierre, E., Vadi, D., Vadasz, C., and Buzsáki, G. (1995). Spike-and-wave epilepsy in rats: sex differences and inheritance of physiological traits. *Neuroscience* 64, 301-317.

Penttonen, M., Nurminen, N., Miettinen, R., Sirvio, J., Henze, D.A., Csicsvari, J., and Buzsáki, G. (1999). Ultra-slow oscillation (0.025 Hz) triggers hippocampal afterdischarges in Wistar rats. *Neuroscience* 94, 735-743.

Ruskin, D.N., Bergstrom, D.A., Kaneoke, Y., Patel, B.N., Twery, M.J., and Walters, J.R. (1999). Multisecond oscillations in firing rate in the basal ganglia: robust modulation by dopamine receptor activation and anesthesia. *Journal of neurophysiology* 81, 2046-2055.

Sirota, A., Csicsvari, J., Buhl, D., and Buzsáki, G. (2003). Communication between neocortex and hippocampus during sleep in rodents. *Proceedings of the National Academy of Sciences of the United States of America* 100, 2065-2069.

**Supplementary Note 4.** A systematic comparison of evoked responses across various species should be a subject for another review. There is consensus that the magnitude, shape, brain structure localization, pharmacological sensitivity, synaptic-circuit mechanisms and behavioral correlations are preserved across the various mammalian species. The latency of the various components of evoked signals in rats and mice (N1, P2, N2 and P3) are 30-50% shorter than in humans. Note, however, that the signal has to travel much longer distances in the human brain. In humans these components roughly correspond to N100 msec, P200, N250 msec and P350 msec, whereas in rats and mice they correspond approximately to 50, 100, 170 and 250-350 msec (Begleiter et al., 1967).

Begleiter H, Porjesz B, Gross MM. Cortical evoked potentials and psychopathology. A critical review. *Arch Gen Psychiatry*. 1967 Dec;17(6):755-8.

See extended references in:

([http://projekter.aau.dk/projekter/files/63443249/Joachim\\_Ahlbeck\\_Master\\_thesis\\_Electrophysiological\\_characterization\\_of\\_P300\\_ERP\\_in\\_a\\_rat\\_model\\_of\\_AD\\_2012.pdf](http://projekter.aau.dk/projekter/files/63443249/Joachim_Ahlbeck_Master_thesis_Electrophysiological_characterization_of_P300_ERP_in_a_rat_model_of_AD_2012.pdf)).
